# Supplementary material
Source: MDPI journal article supplement (https://www.mdpi.com/2304-6740/6/1/21)
Supplement: s1 [file s1]

# Supplementary Materials

## Synthesis and Functionalization of a 1,2-Bis(trimethylsilyl)-1,2-disilacyclohexene That Can Serve as a Unit of *cis*-1,2-Dialkyldisilene

*Naohiko Akasaka, Kaho Tanaka, Shintaro Ishida, Takeaki Iwamoto\**

Department of Chemistry, Graduate School of Science, Tohoku University, Sendai, Miyagi 980-8578, Japan

Email: iwamoto@m.tohoku.ac.jp

### Contents

|                                                                                           |     |
|-------------------------------------------------------------------------------------------|-----|
| 1. NMR Spectra.....                                                                       | S2  |
| 2. UV-vis Spectra .....                                                                   | S25 |
| 3. DFT Calculations .....                                                                 | S30 |
| Calculated Transition Energies and Oscillator Strengths of the Electron Transitions ..... | S31 |
| 4. References .....                                                                       | S48 |

## 1. NMR Spectra

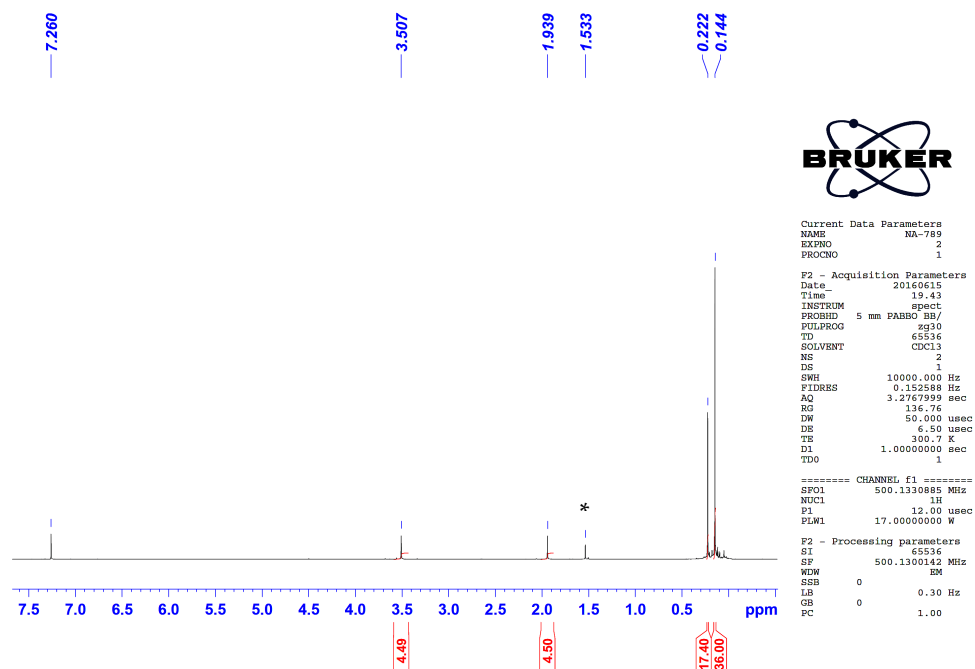

Figure S1.  $^1\text{H}$  NMR spectrum of **2** in  $\text{CDCl}_3$  at rt. \* =  $\text{H}_2\text{O}$ .

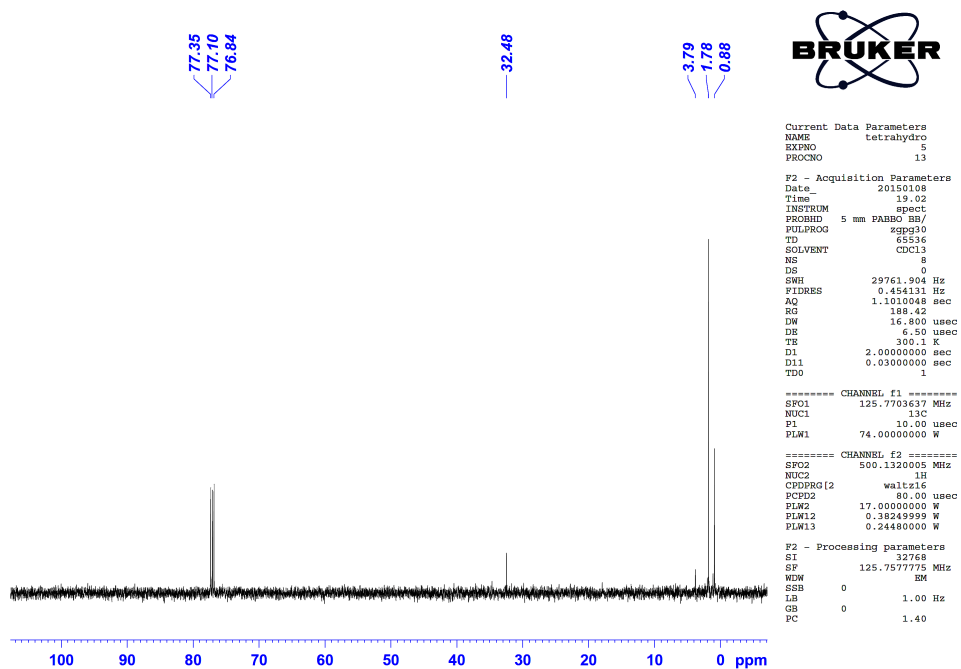

Figure S2.  $^{13}\text{C}\{^1\text{H}\}$  NMR spectrum of **2** in  $\text{CDCl}_3$  at rt.

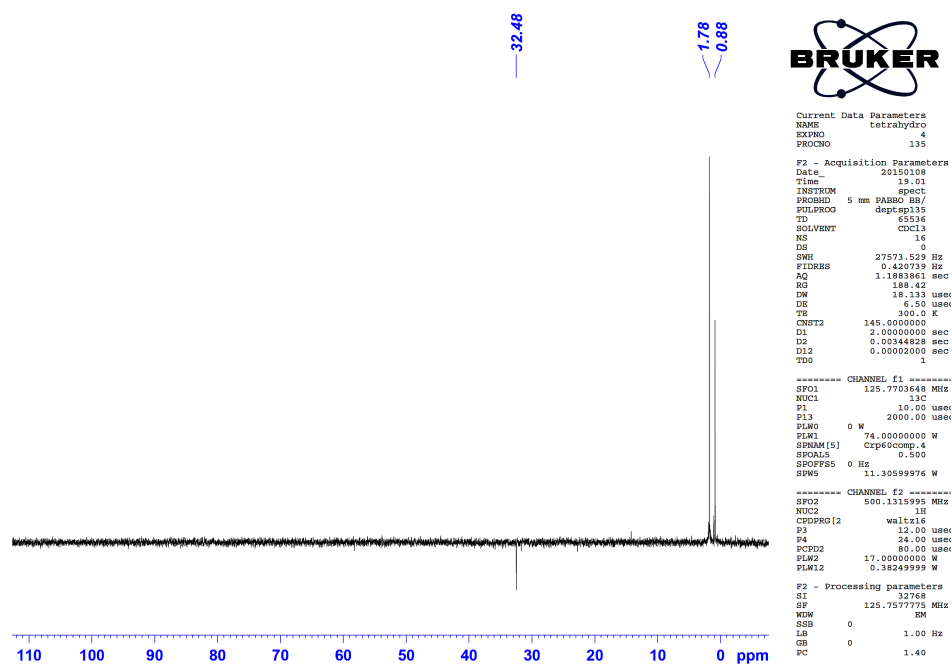

Figure S3.  $^{13}\text{C}\{^1\text{H}\}$  NMR spectrum of **2** using DEPT 135 pulse sequence in  $\text{CDCl}_3$  at rt.

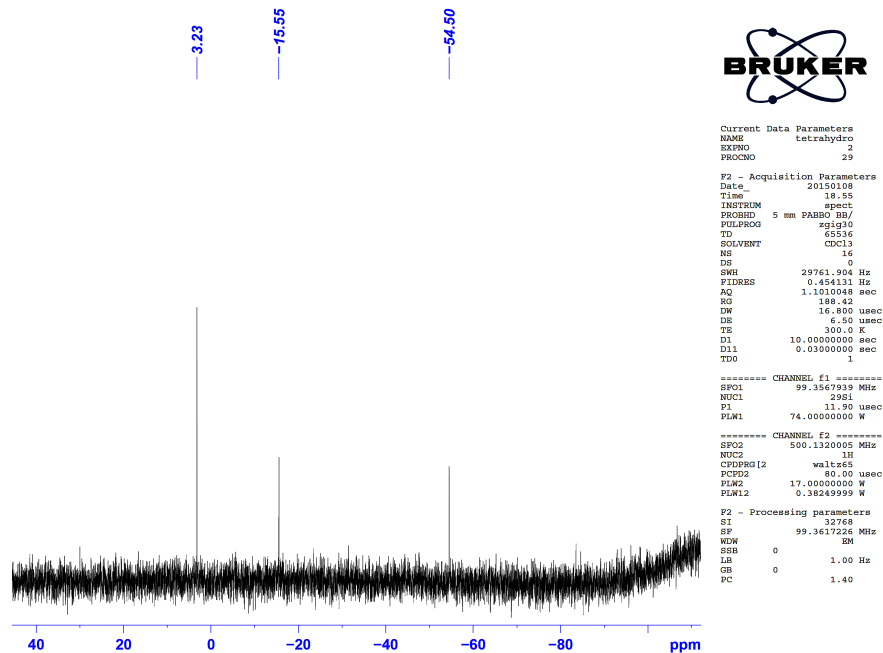

Figure S4.  $^{29}\text{Si}\{^1\text{H}\}$  NMR spectrum of **2** using the inverse-gated pulse sequence in  $\text{CDCl}_3$  at rt.

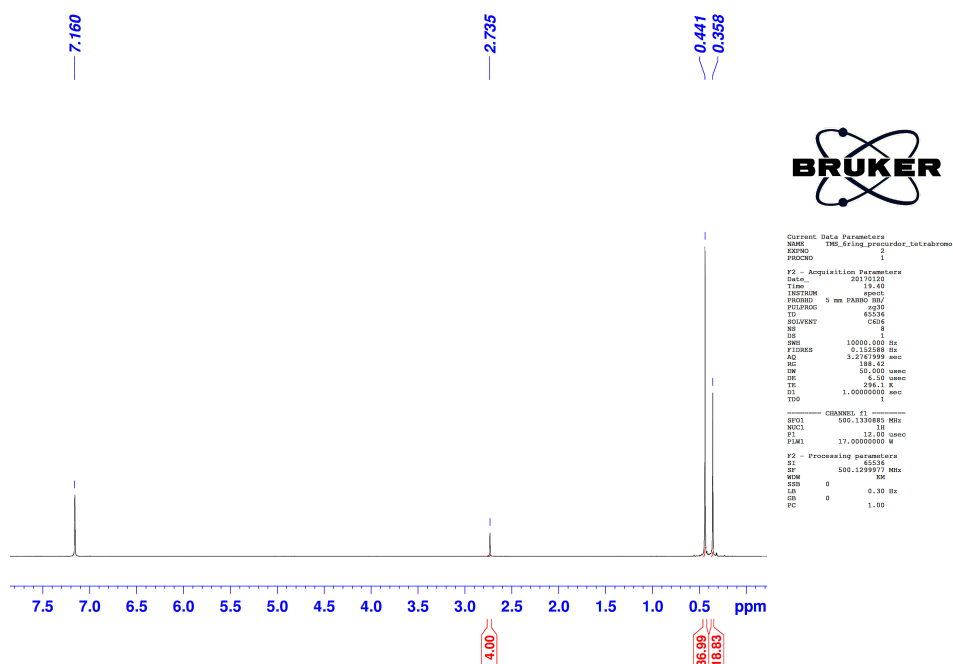

Figure S5.  $^1\text{H}$  NMR spectrum of **3** in  $\text{C}_6\text{D}_6$  at rt.

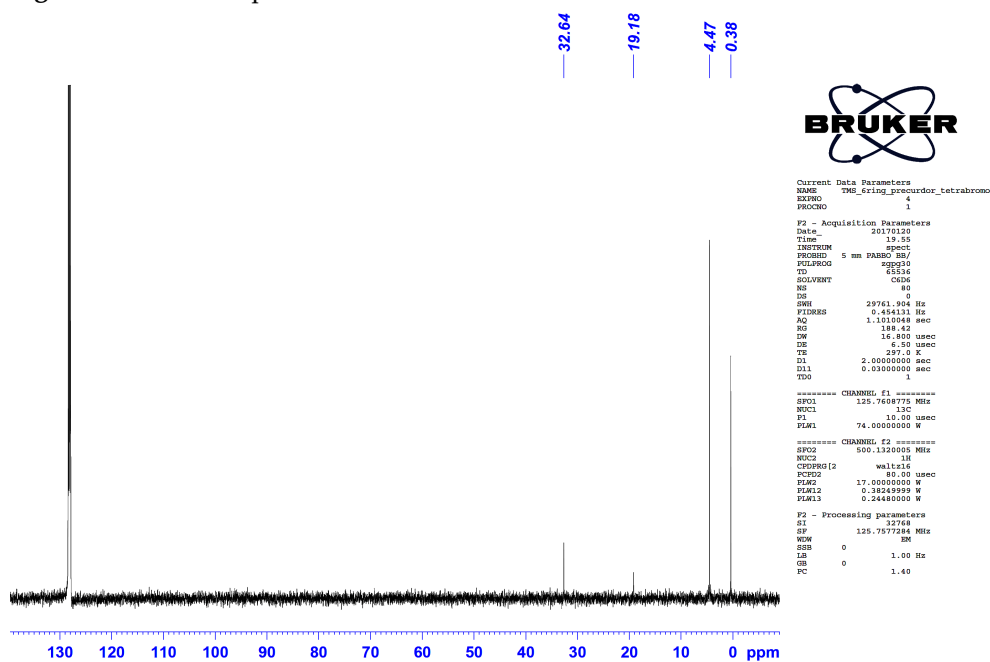

Figure S6.  $^{13}\text{C}\{^1\text{H}\}$  NMR spectrum of **3** in  $\text{C}_6\text{D}_6$  at rt.

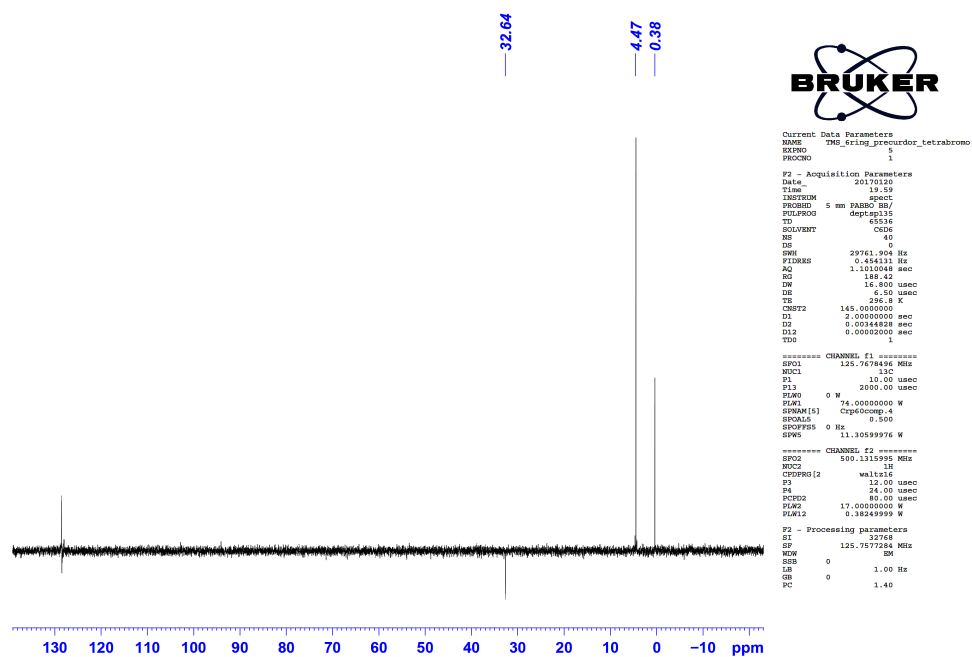

Figure S7.  $^{13}\text{C}\{^1\text{H}\}$  NMR spectrum of **3** using DEPT 135 pulse sequence in  $\text{C}_6\text{D}_6$  at rt.

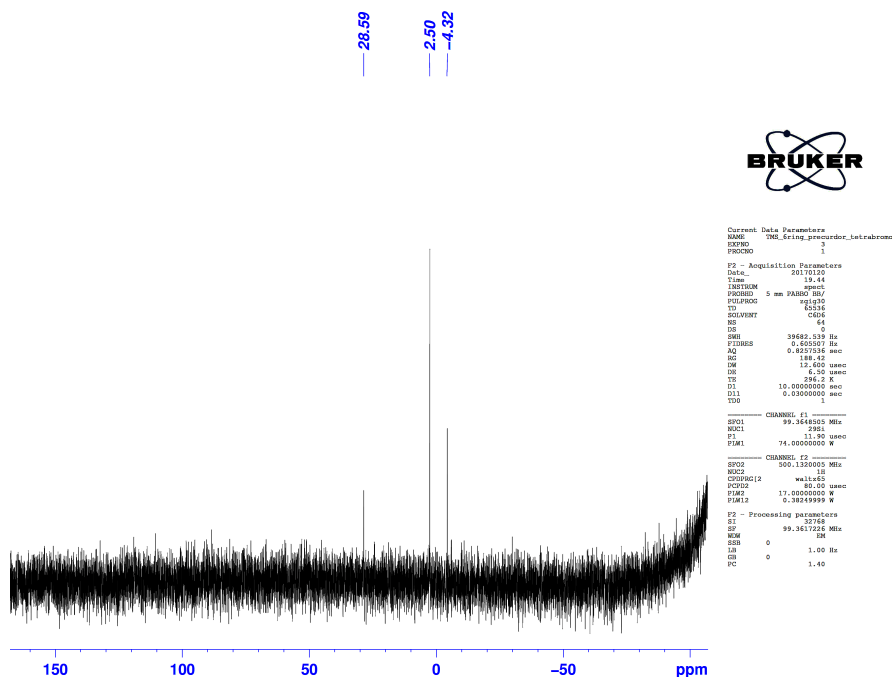

Figure S8.  $^{29}\text{Si}\{^1\text{H}\}$  NMR spectrum of **3** using the inverse-gated pulse sequence in  $\text{C}_6\text{D}_6$  at rt.

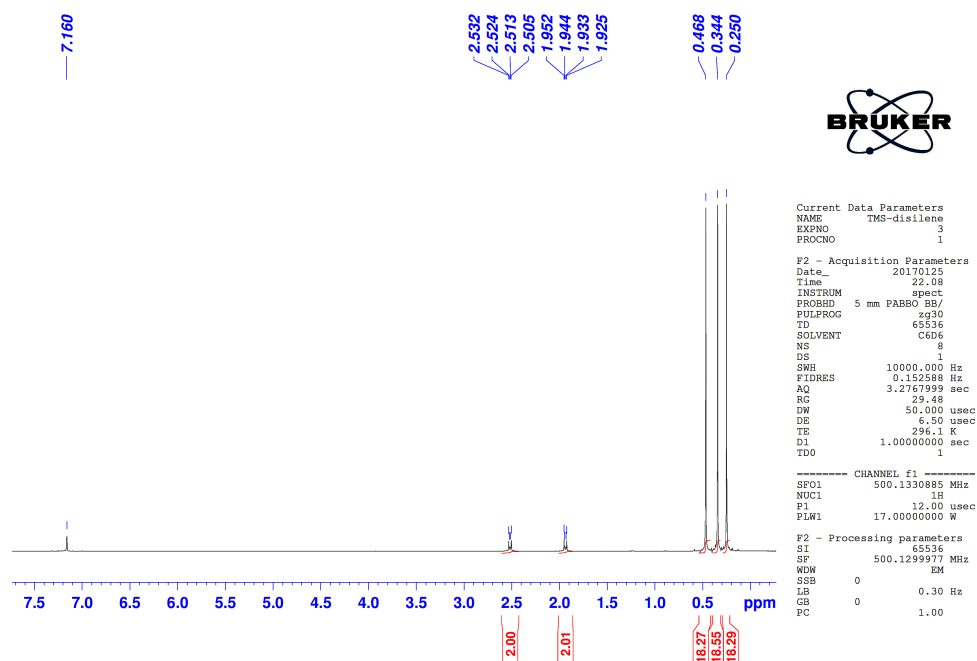

Figure S9.  $^1\text{H}$  NMR spectrum of **1** in  $\text{C}_6\text{D}_6$  at rt.

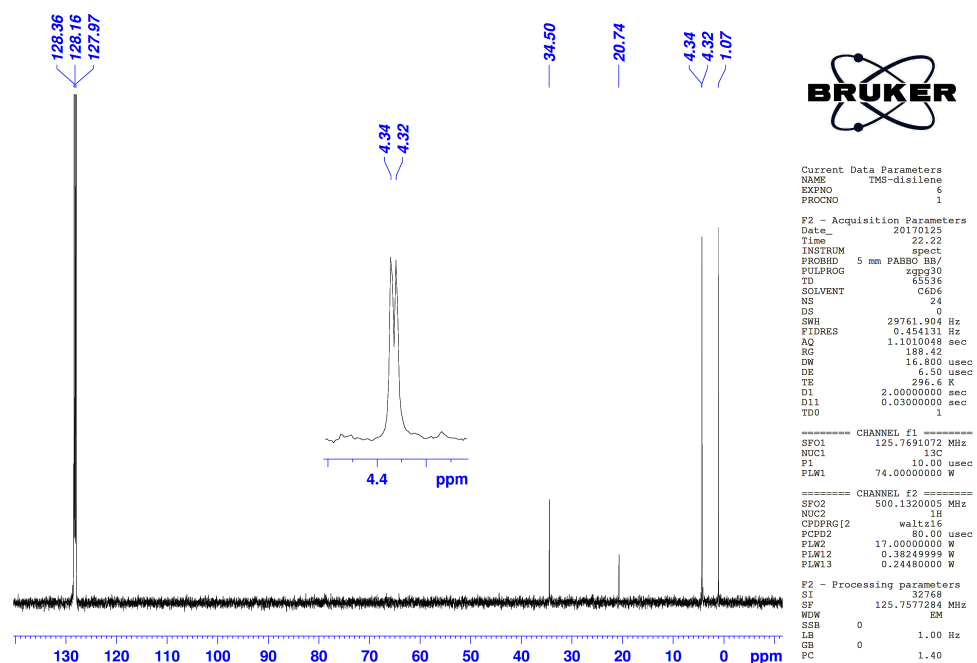

Figure S10.  $^{13}\text{C}\{^1\text{H}\}$  NMR spectrum of **1** in  $\text{C}_6\text{D}_6$  at rt.

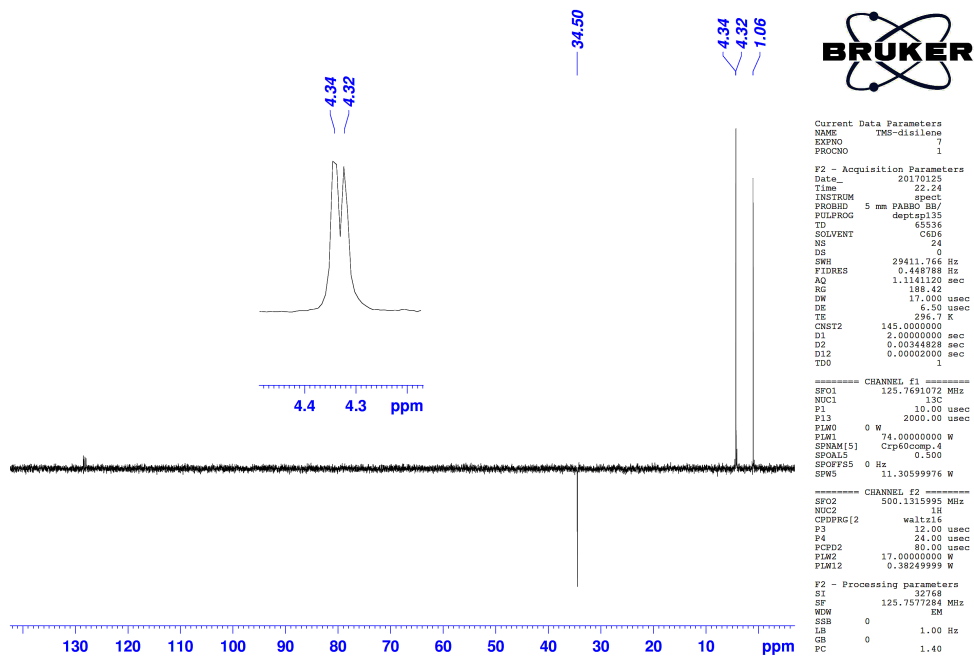

Figure S11.  $^{13}\text{C}\{^1\text{H}\}$  NMR spectrum of **1** using DEPT 135 pulse sequence in  $\text{C}_6\text{D}_6$  at rt.

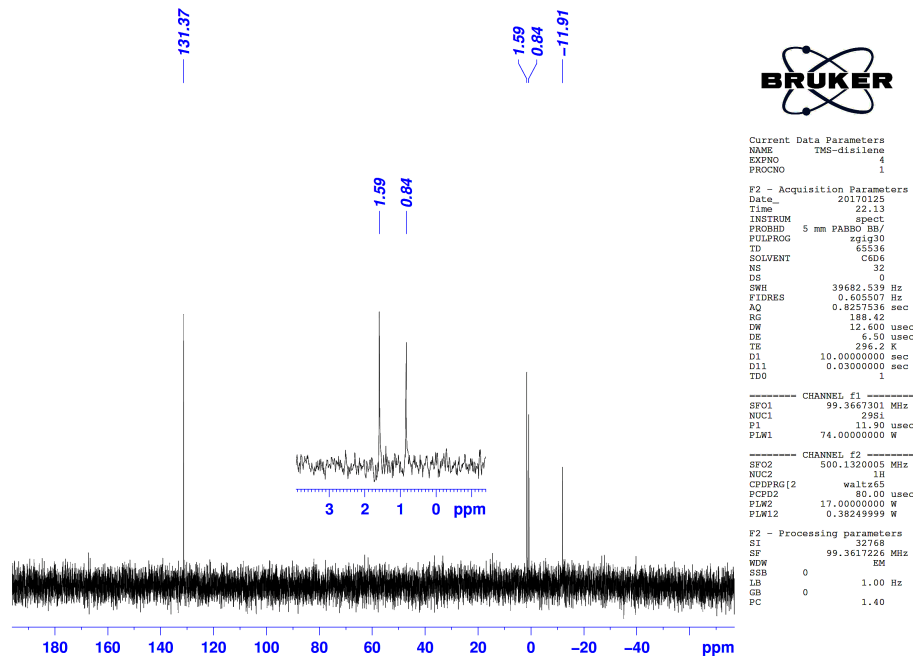

Figure S12.  $^{29}\text{Si}\{^1\text{H}\}$  NMR spectrum of **1** using the inverse-gated pulse sequence in  $\text{C}_6\text{D}_6$  at rt.

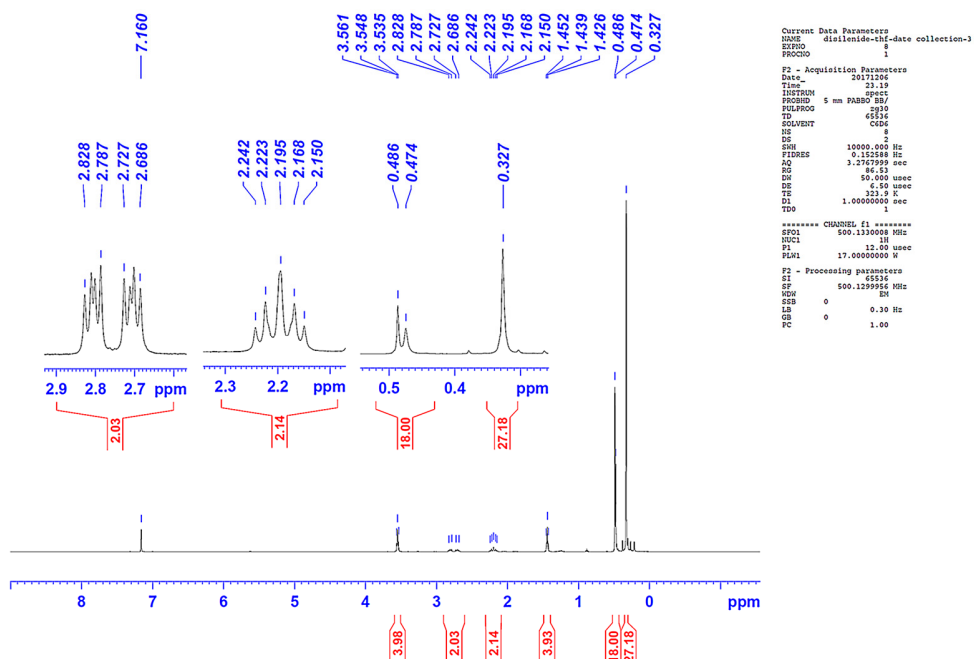

Figure S13.  $^1\text{H}$  NMR spectrum of  $[\text{K}(\text{thf})]_4$  in  $\text{C}_6\text{D}_6$  at  $50^\circ\text{C}$ .

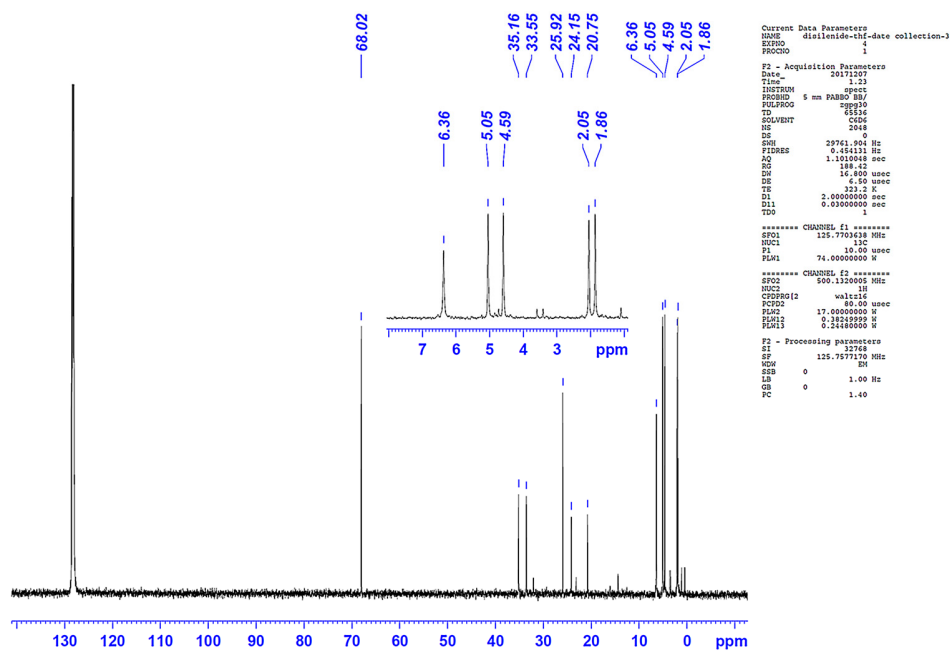

Figure S14.  $^{13}\text{C}\{^1\text{H}\}$  NMR spectrum of  $[\text{K}(\text{thf})]_4$  in  $\text{C}_6\text{D}_6$  at  $50^\circ\text{C}$ .

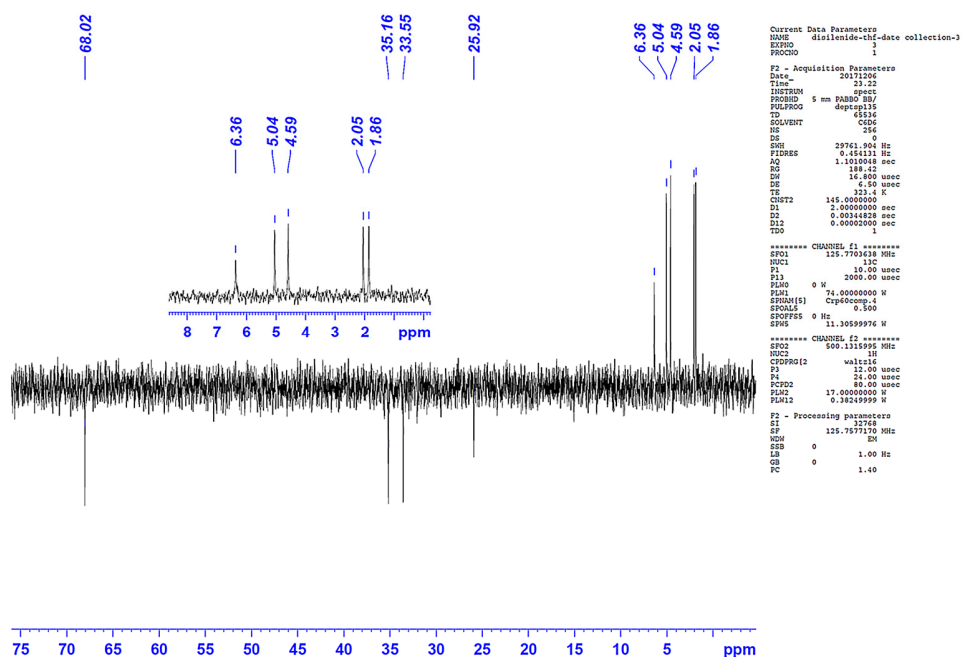

Figure S15.  $^{13}\text{C}\{^1\text{H}\}$  NMR spectrum of  $[\text{K}(\text{thf})]_4$  using DEPT 135 pulse sequence in  $\text{C}_6\text{D}_6$  at  $50^\circ\text{C}$ .

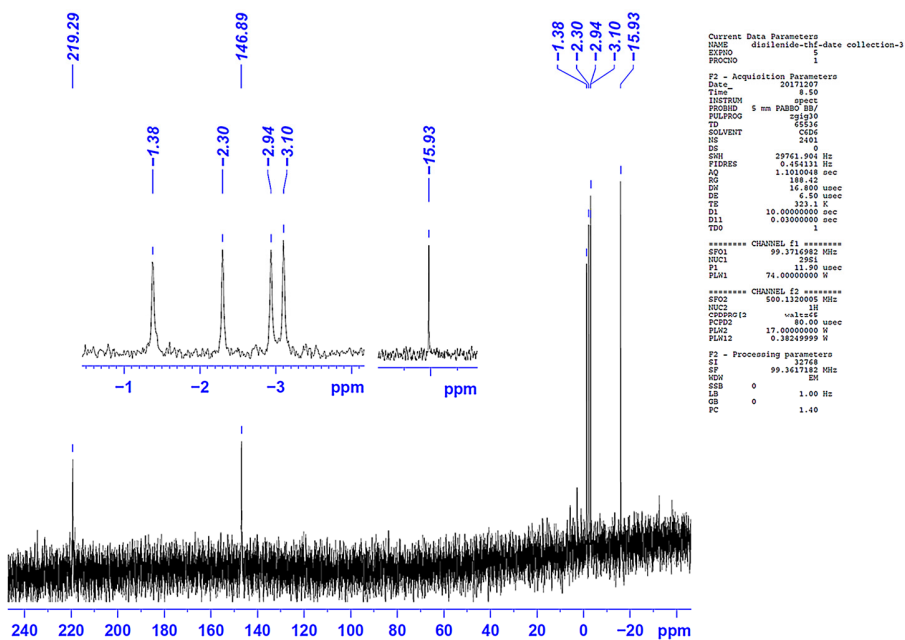

Figure S16.  $^{29}\text{Si}\{^1\text{H}\}$  NMR spectrum of  $[\text{K}(\text{thf})]_4$  using the inverse-gated pulse sequence in  $\text{C}_6\text{D}_6$  at  $50^\circ\text{C}$ .



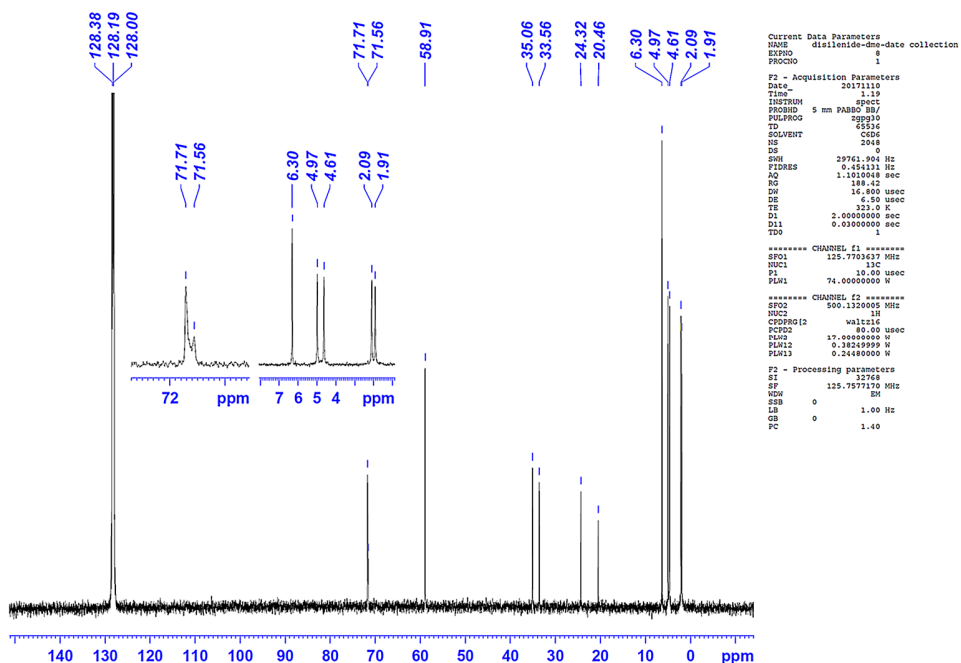

Figure S19.  $^{13}\text{C}\{^1\text{H}\}$  NMR spectrum of  $[\text{K}(\text{dme})]_4$  in  $\text{C}_6\text{D}_6$  at  $50^\circ\text{C}$ .

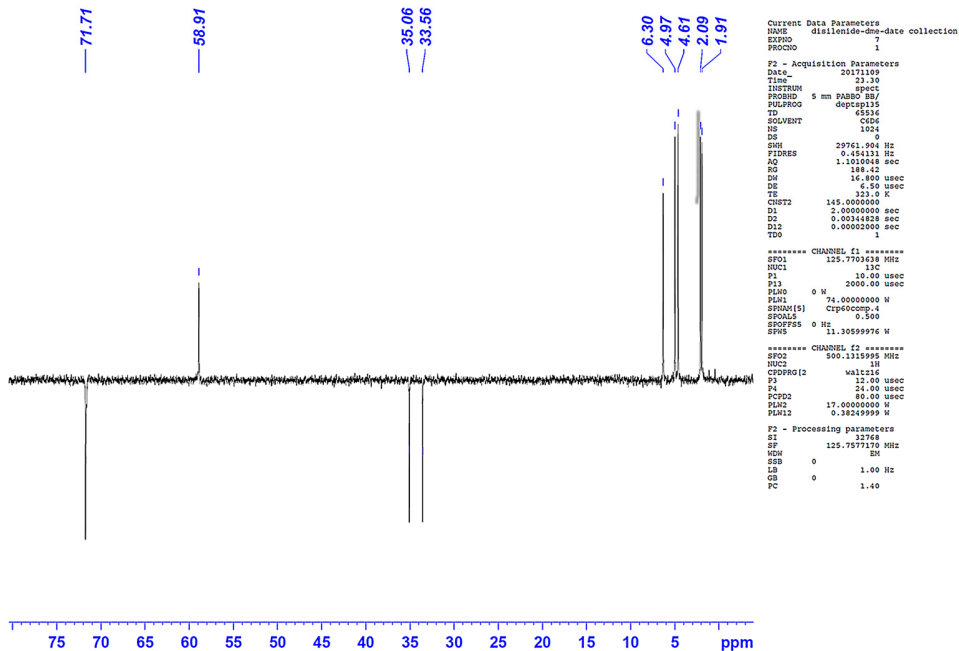

Figure S20.  $^{13}\text{C}\{^1\text{H}\}$  NMR spectrum of  $[\text{K}(\text{dme})]_4$  using DEPT 135 pulse sequence in  $\text{C}_6\text{D}_6$  at  $50^\circ\text{C}$ .

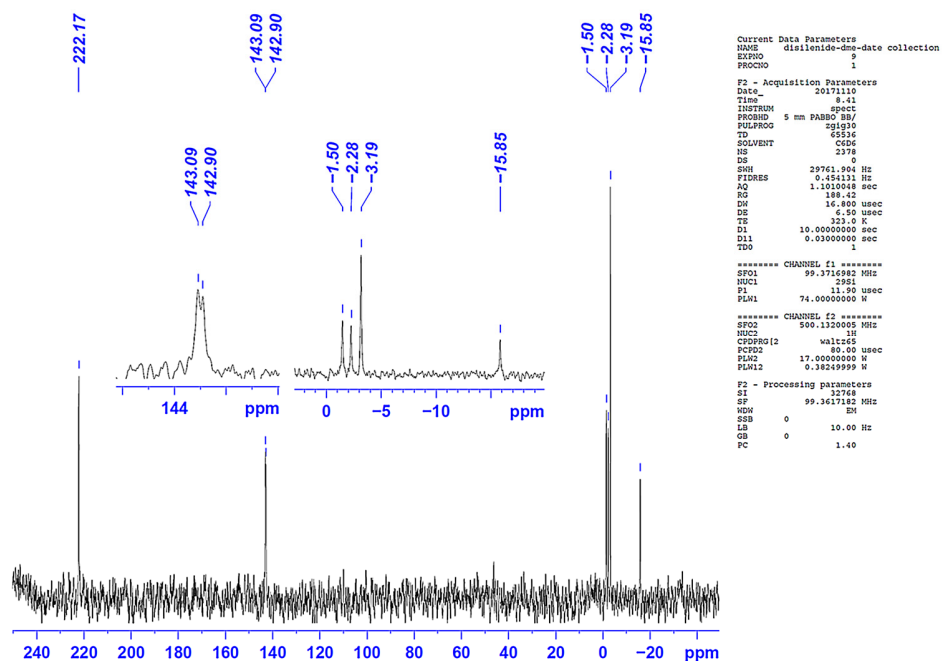

**Figure S21.**  $^{29}\text{Si}\{^1\text{H}\}$  NMR spectrum of  $[\text{K}(\text{dme})]_4$  using the inverse-gated pulse sequence in  $\text{C}_6\text{D}_6$  at  $50^\circ\text{C}$ .

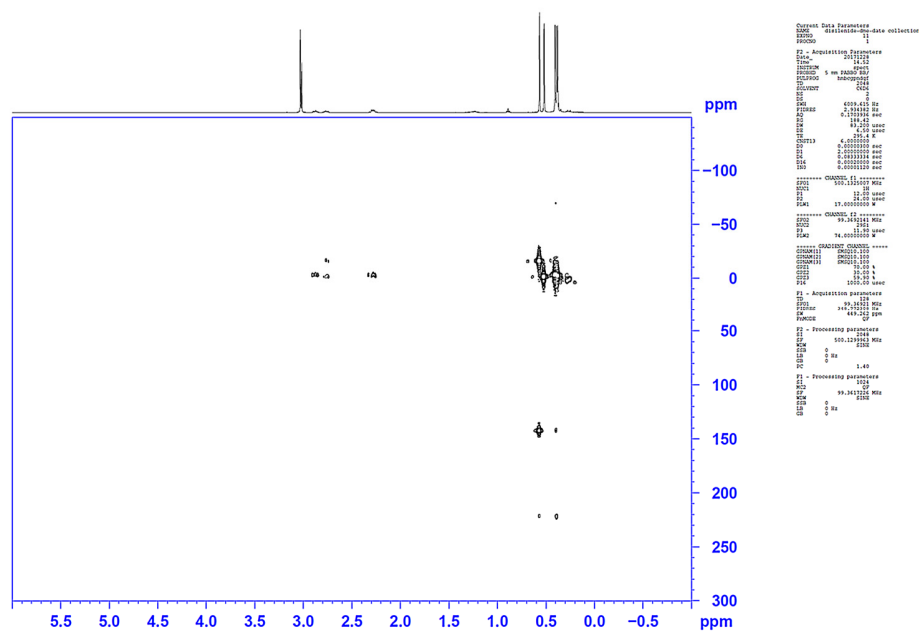

**Figure S22.**  $^1\text{H}$ - $^{29}\text{Si}$  HMBC 2D NMR spectrum of  $[\text{K}(\text{dme})]_4$  in  $\text{C}_6\text{D}_6$  at  $50^\circ\text{C}$ .

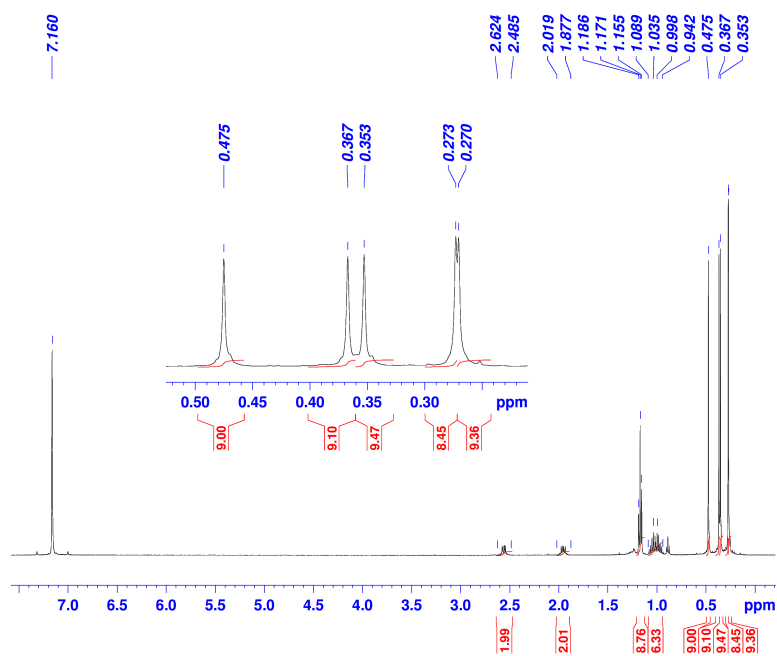

Figure S23.  $^1\text{H}$  NMR spectrum of **5** in  $\text{C}_6\text{D}_6$  at rt (\* = hexane)

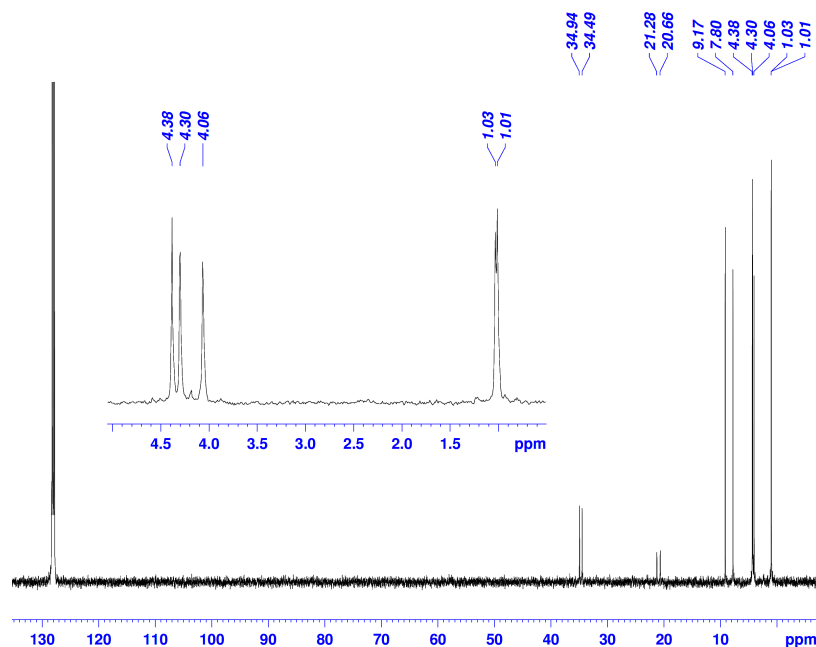

Figure S24.  $^{13}\text{C}\{^1\text{H}\}$  NMR spectrum of **5** in  $\text{C}_6\text{D}_6$  at rt.

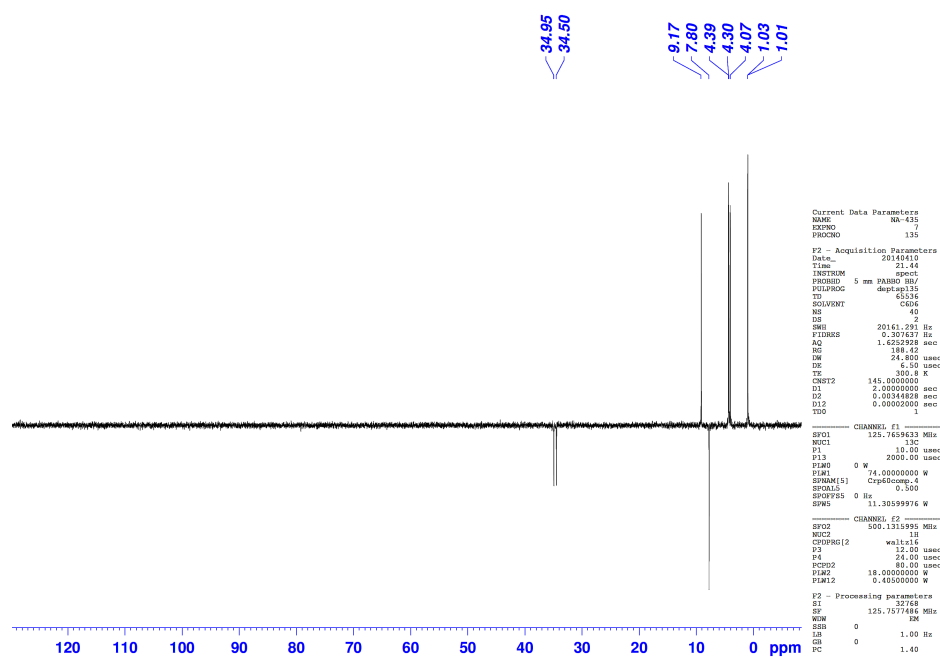

Figure S25.  $^{13}\text{C}\{^1\text{H}\}$  NMR spectrum of **5** using DEPT 135 pulse sequence in  $\text{C}_6\text{D}_6$  at rt.

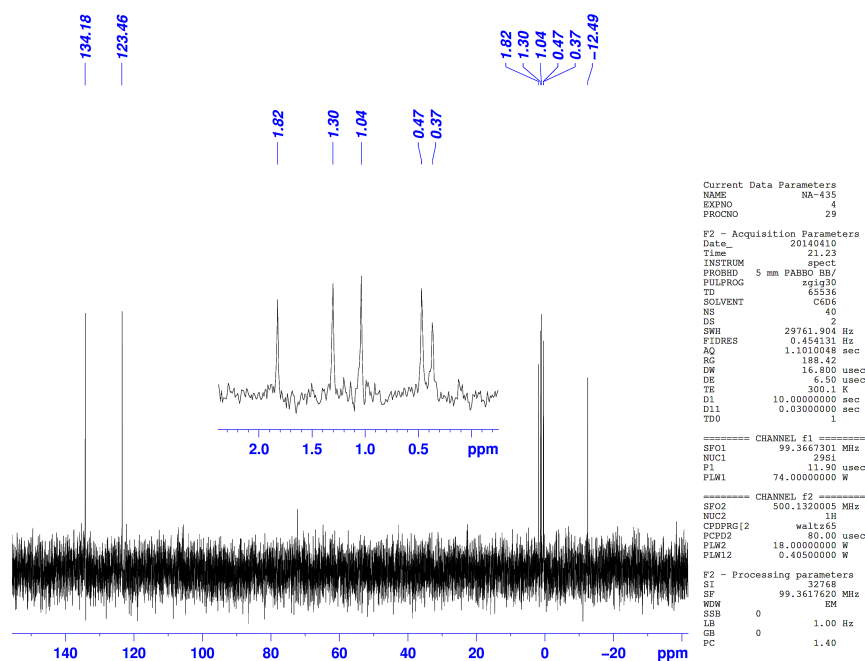

Figure S26.  $^{29}\text{Si}\{^1\text{H}\}$  NMR spectrum of **5** using the inverse-gated pulse sequence in  $\text{C}_6\text{D}_6$  at rt.

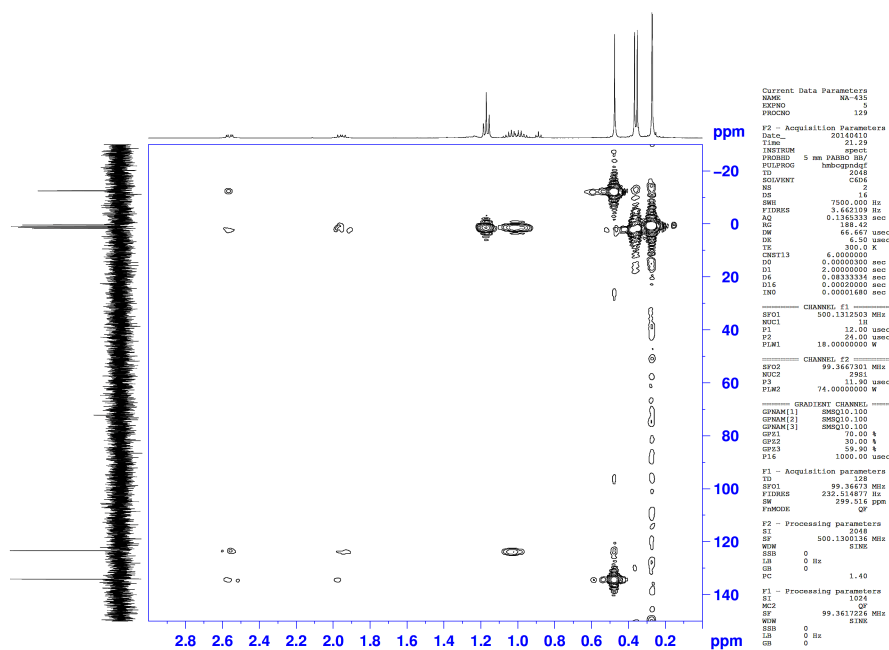

Figure S27.  $^1\text{H}$ - $^{29}\text{Si}$  HMBC 2D NMR spectrum of **5** in  $\text{C}_6\text{D}_6$  at rt.

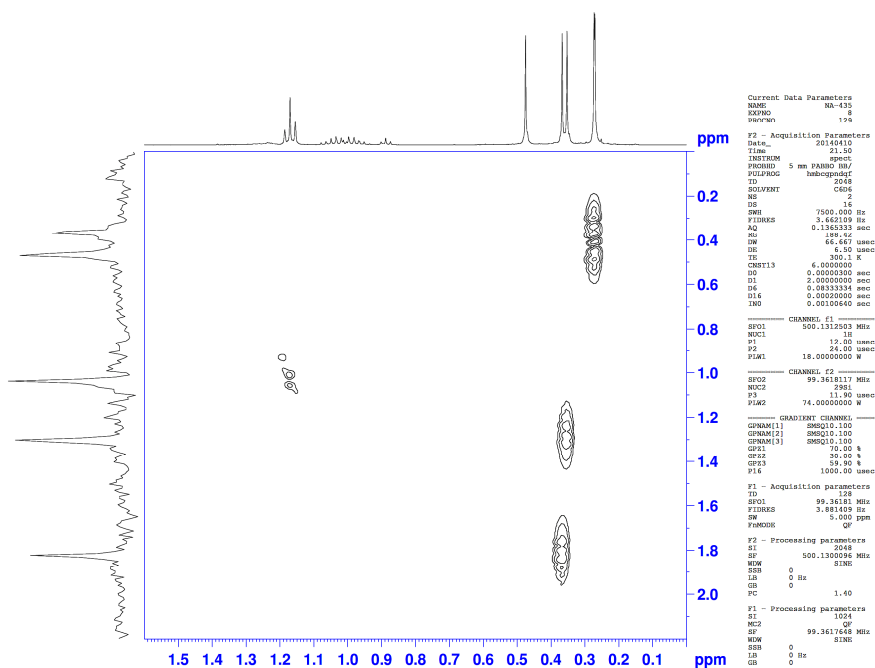

Figure S28. Magnified  $^1\text{H}$ - $^{29}\text{Si}$  HMBC 2D NMR spectrum of **5** ( $\text{SiMe}_3$  region) in  $\text{C}_6\text{D}_6$  at rt.

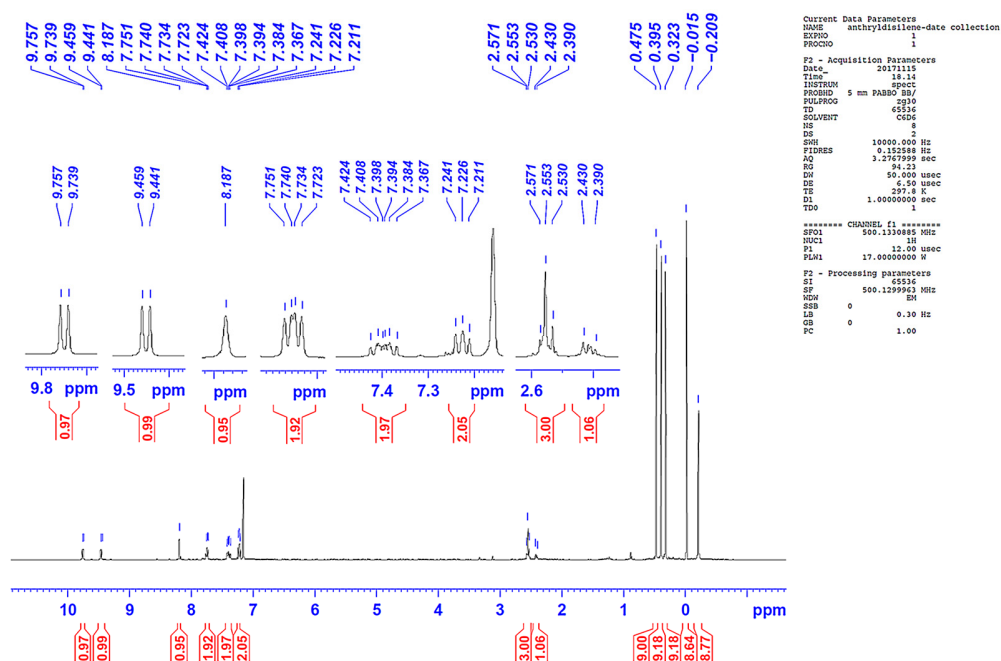

Figure S29.  $^1\text{H}$  NMR spectrum of **6** in  $\text{C}_6\text{D}_6$  at rt.

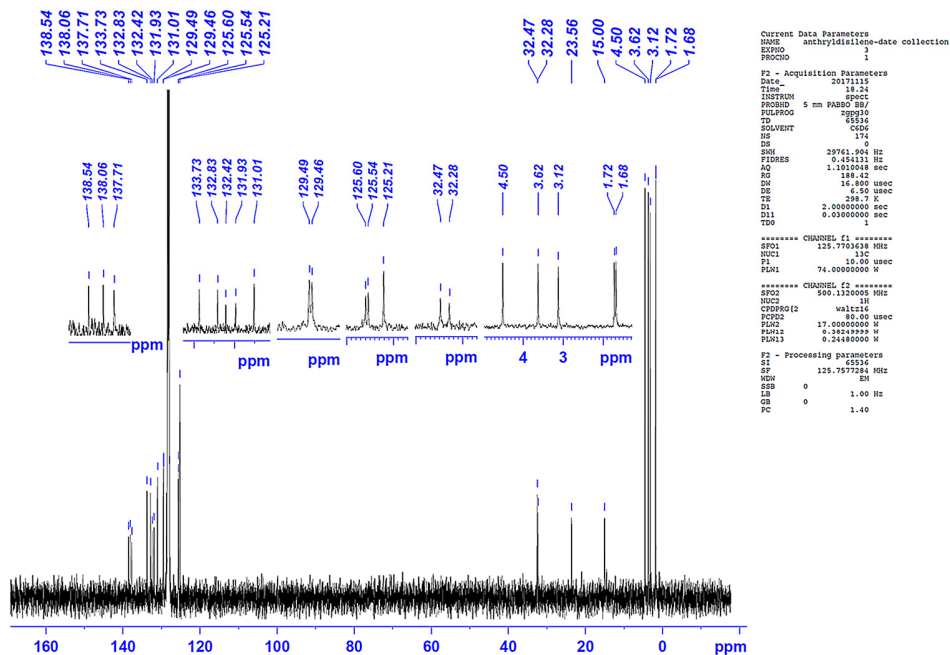

Figure S30.  $^{13}\text{C}\{^1\text{H}\}$  NMR spectrum of **6** in  $\text{C}_6\text{D}_6$  at rt.

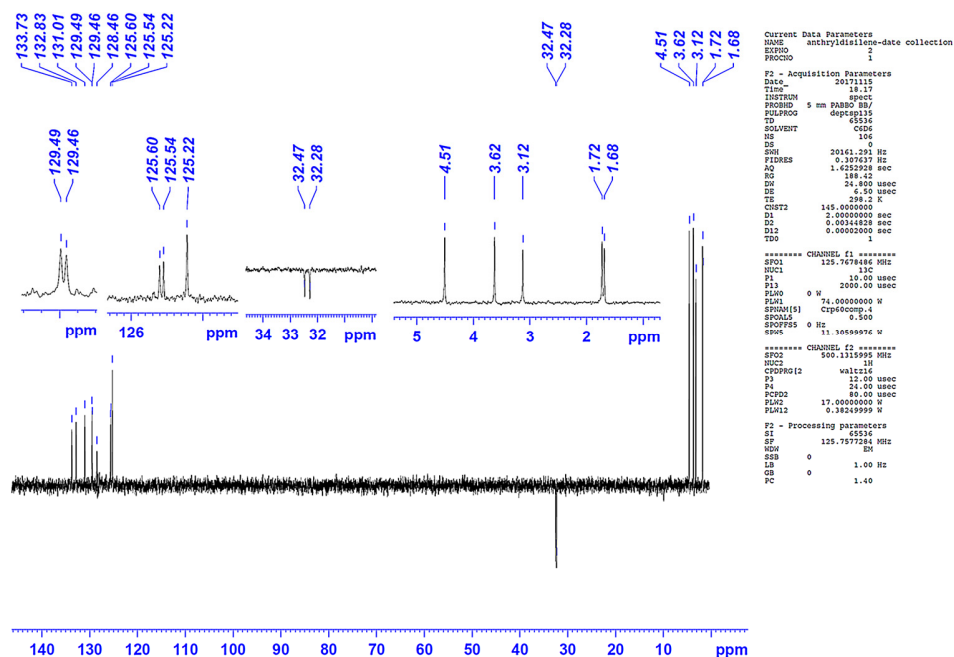

Figure S31.  $^{13}\text{C}\{^1\text{H}\}$  NMR spectrum of **6** using DEPT 135 pulse sequence in  $\text{C}_6\text{D}_6$  at rt.

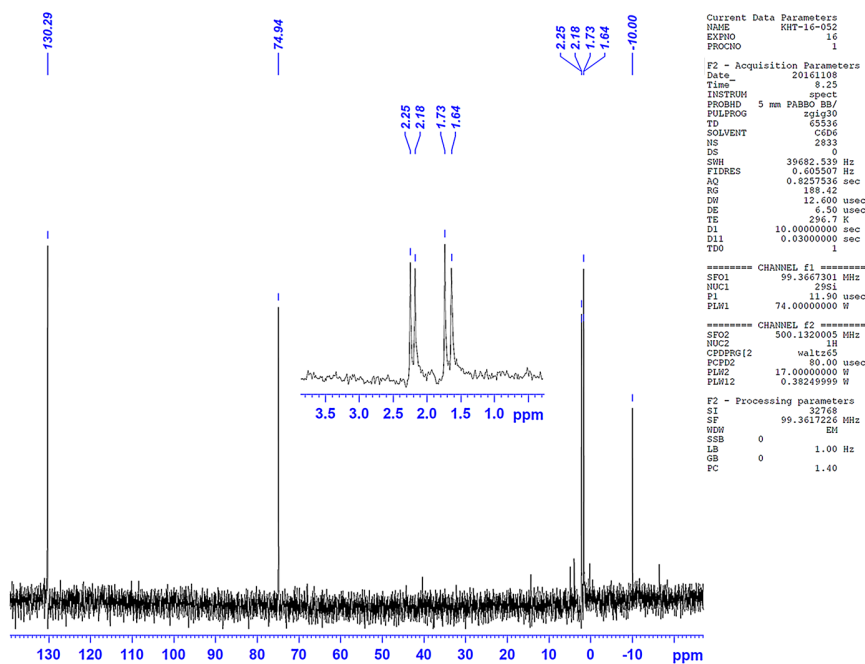

Figure S32.  $^{29}\text{Si}\{^1\text{H}\}$  NMR spectrum of **6** using the inverse-gated pulse sequence in  $\text{C}_6\text{D}_6$  at rt.

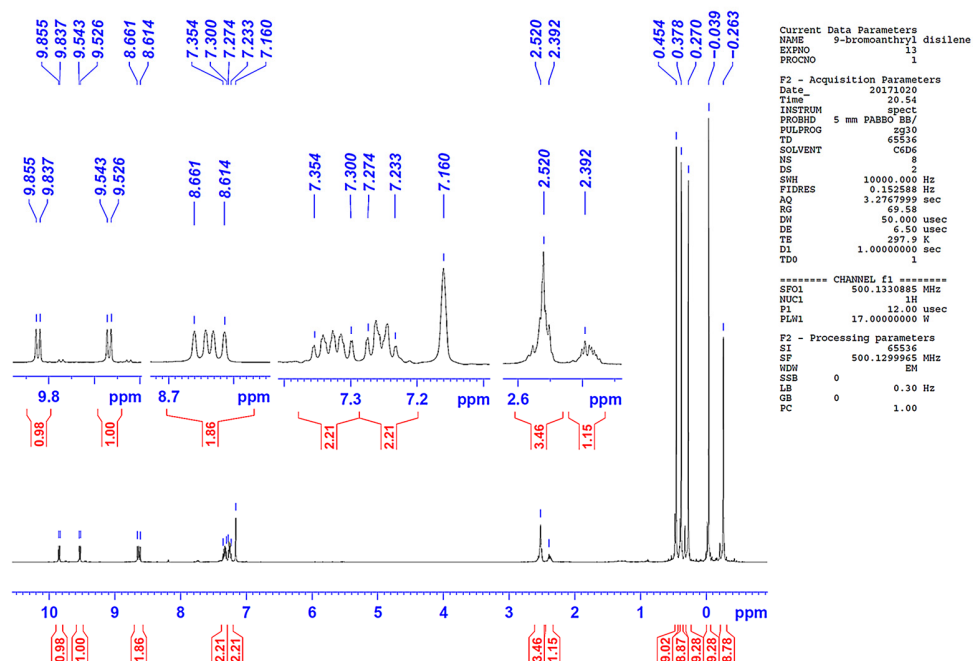

Figure S33.  $^1\text{H}$  NMR spectrum of  $6^{\text{Br}}$  in  $\text{C}_6\text{D}_6$  at rt.

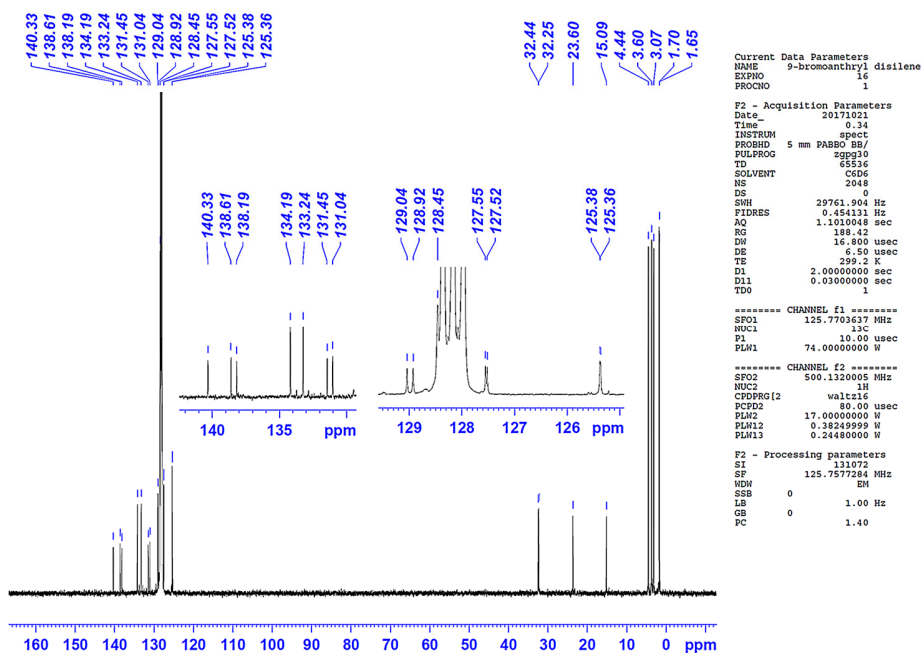

Figure S34.  $^{13}\text{C}\{^1\text{H}\}$  NMR spectrum of  $6^{\text{Br}}$  in  $\text{C}_6\text{D}_6$  at rt.

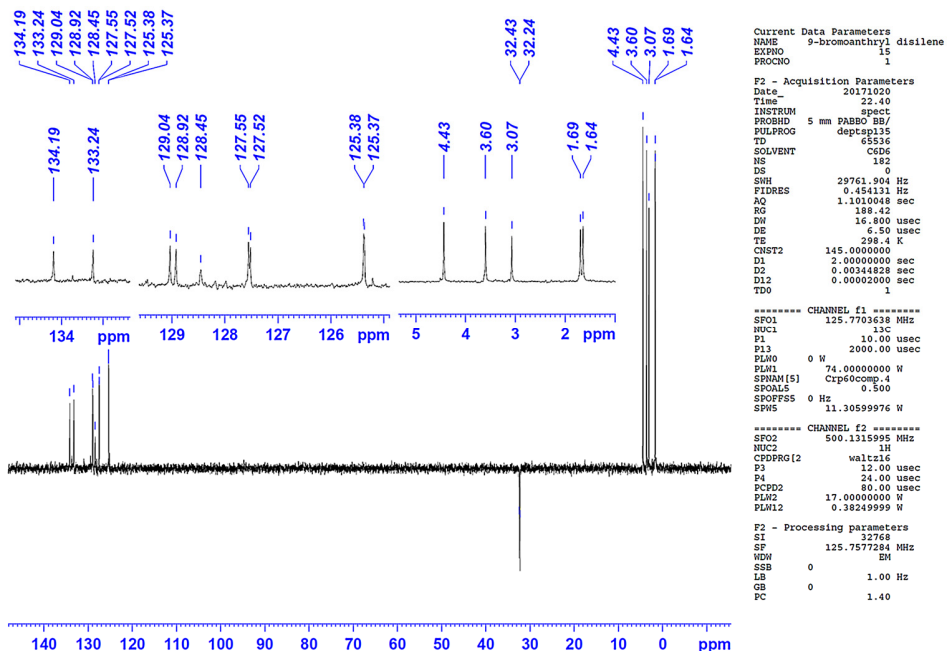

Figure S35.  $^{13}\text{C}\{^1\text{H}\}$  NMR spectrum of  $6^{\text{Br}}$  using DEPT 135 pulse sequence in  $\text{C}_6\text{D}_6$  at rt.

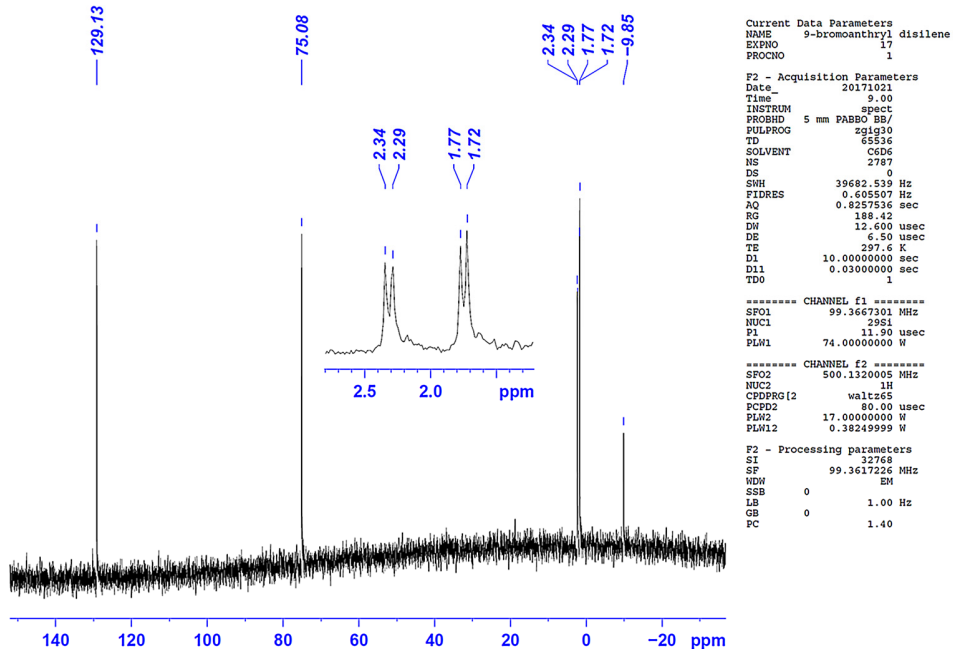

Figure S36.  $^{29}\text{Si}\{^1\text{H}\}$  NMR spectrum of  $6^{\text{Br}}$  using the inverse-gated pulse sequence in  $\text{C}_6\text{D}_6$  at rt.

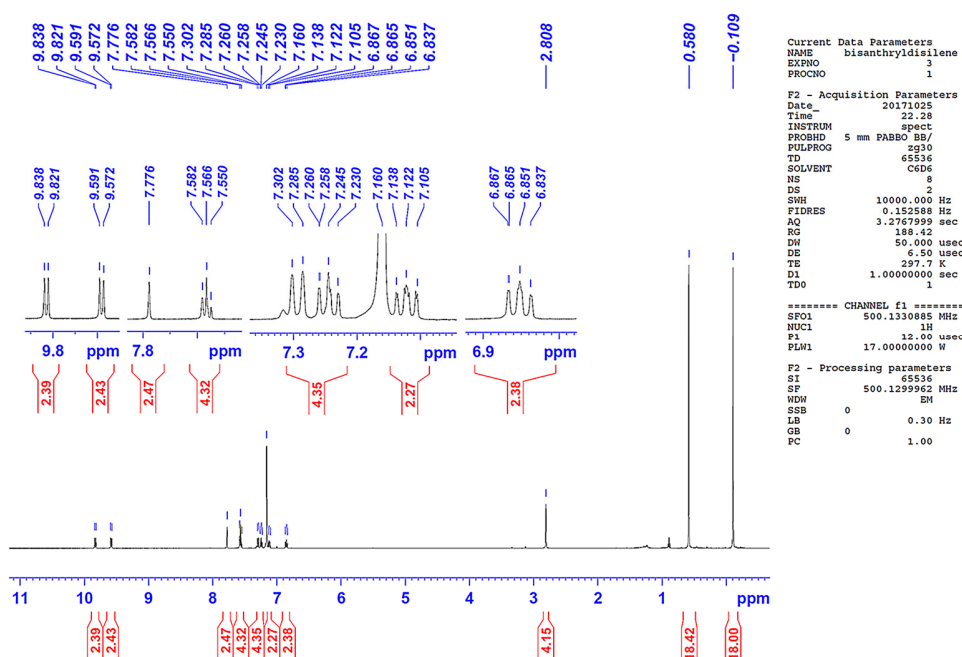

Figure S37.  $^1\text{H}$  NMR spectrum of **7** in  $\text{C}_6\text{D}_6$  at rt.

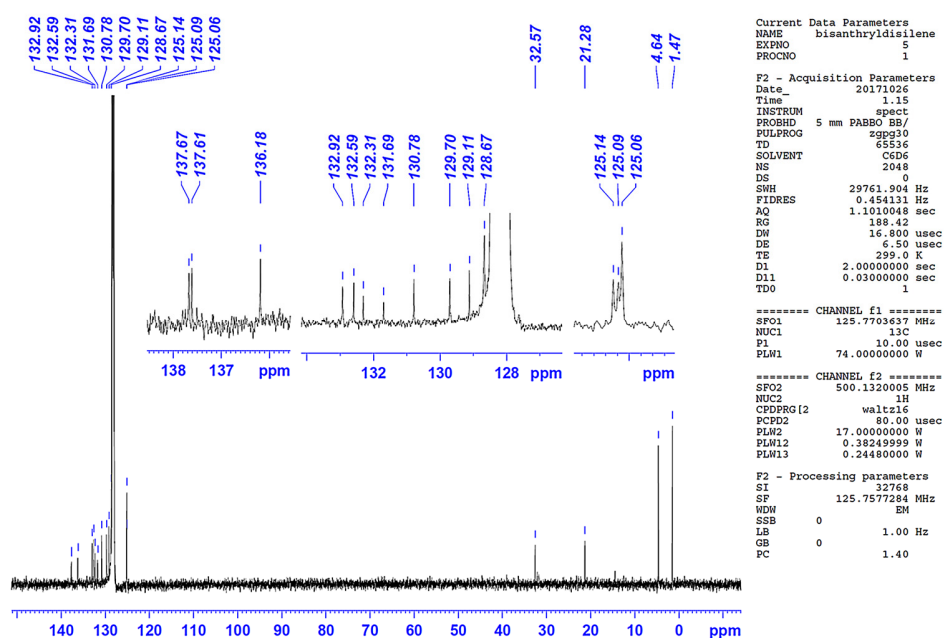

Figure S38.  $^{13}\text{C}\{^1\text{H}\}$  NMR spectrum of **7** in  $\text{C}_6\text{D}_6$  at rt.

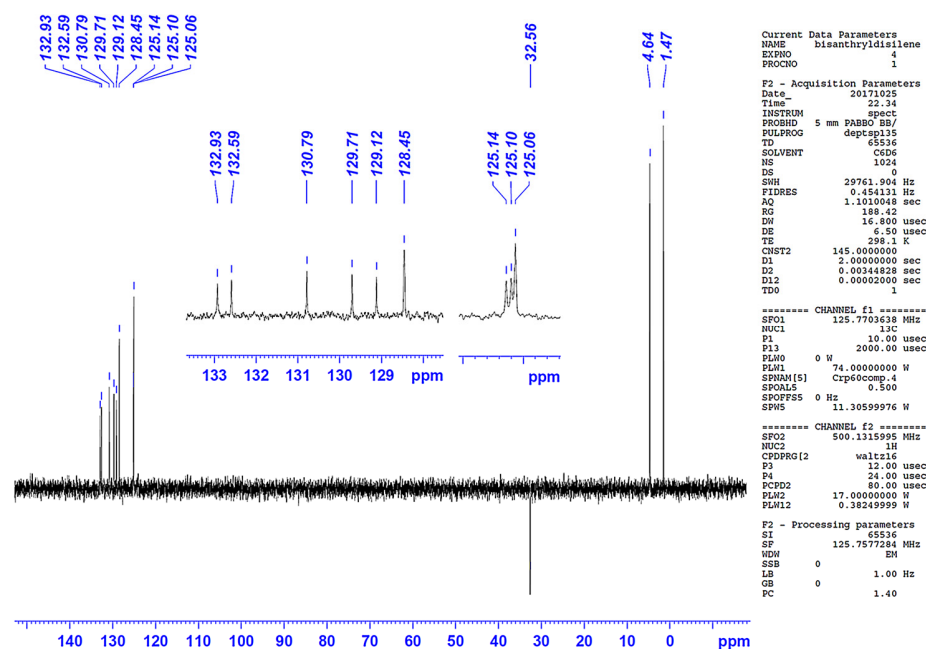

Figure S39.  $^{13}\text{C}\{^1\text{H}\}$  NMR spectrum of **7** using DEPT 135 pulse sequence in  $\text{C}_6\text{D}_6$  at rt.

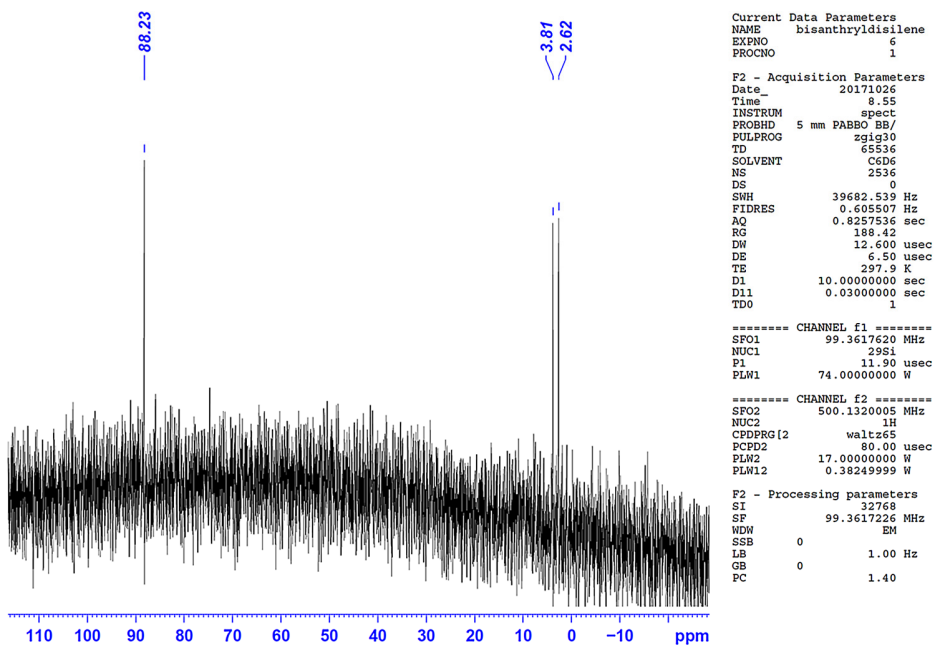

Figure S40.  $^{29}\text{Si}\{^1\text{H}\}$  NMR spectrum of **7** using the inverse-gated pulse sequence in  $\text{C}_6\text{D}_6$  at rt.

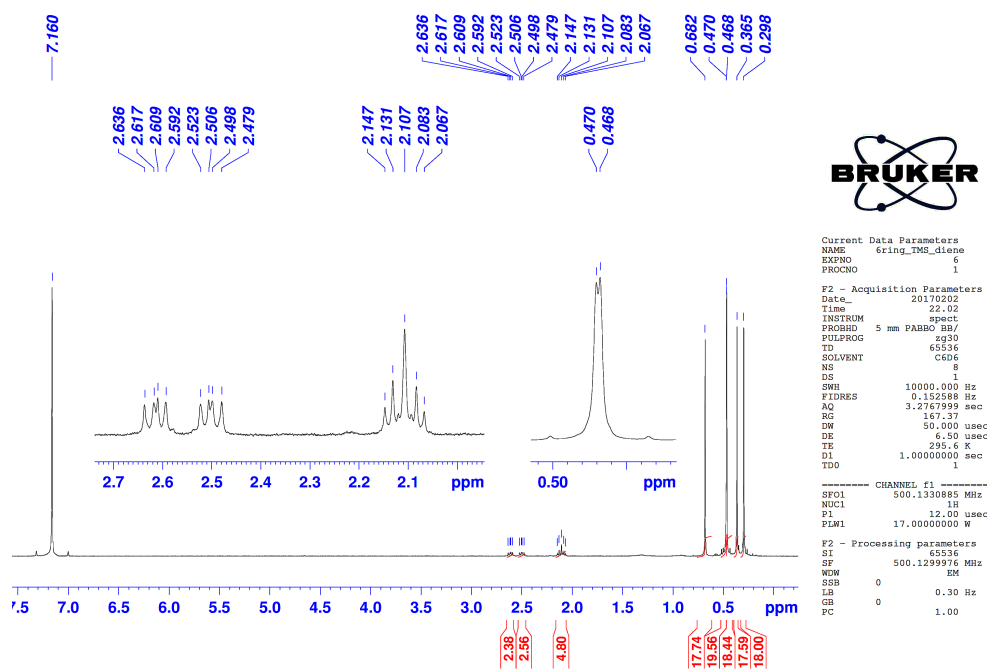

Figure S41.  $^1\text{H}$  NMR spectrum of 8 in  $\text{C}_6\text{D}_6$  at rt.

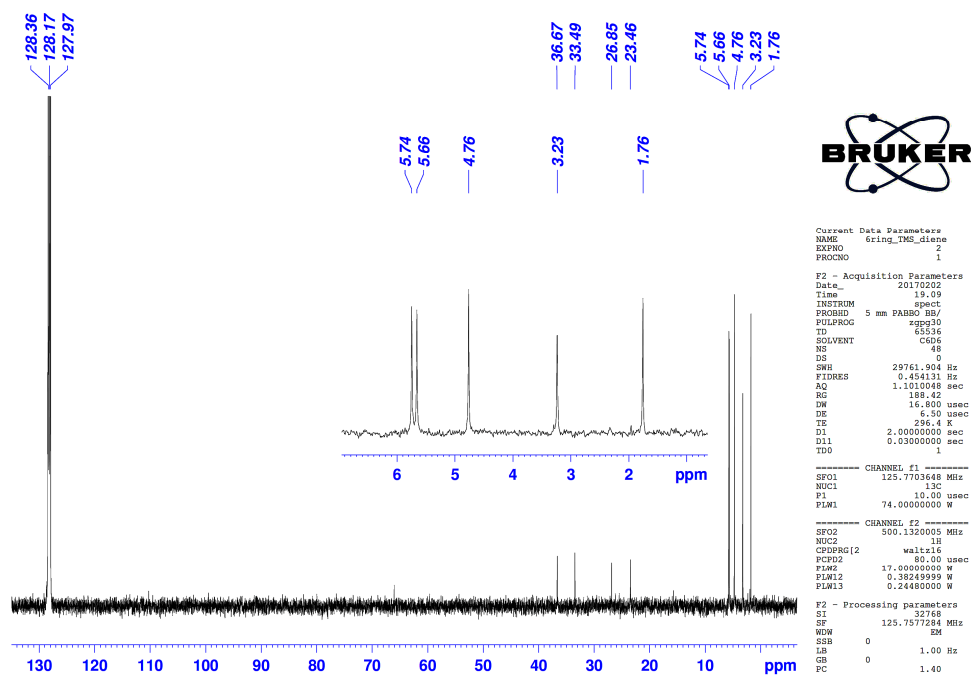

Figure S42.  $^{13}\text{C}\{^1\text{H}\}$  NMR spectrum of 8 in  $\text{C}_6\text{D}_6$  at rt.

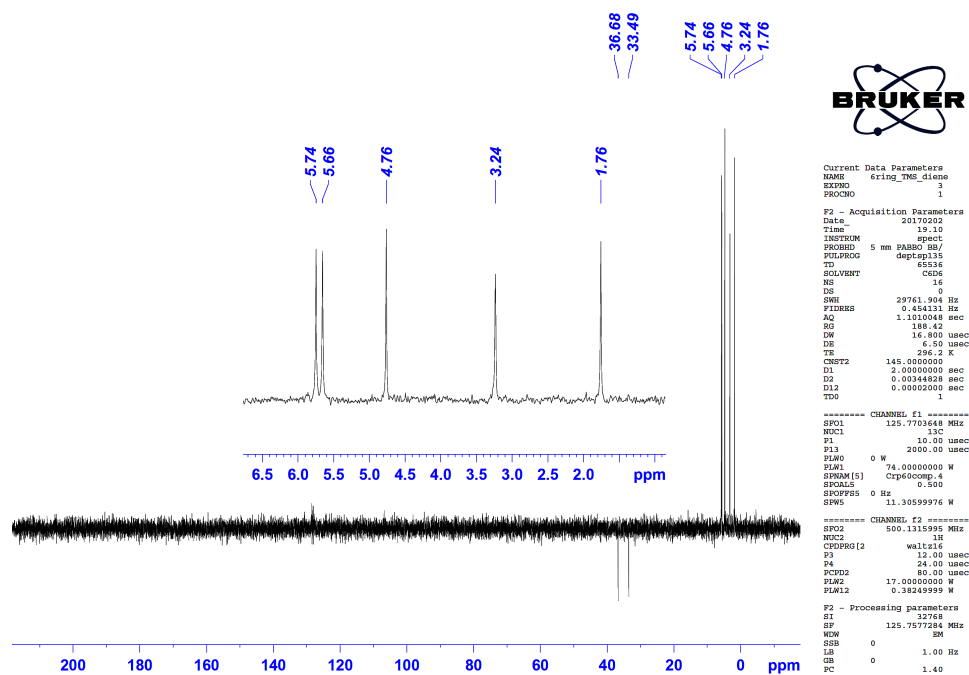

Figure S43.  $^{13}\text{C}\{^1\text{H}\}$  NMR spectrum of **8** using DEPT 135 pulse sequence in  $\text{C}_6\text{D}_6$  at rt.

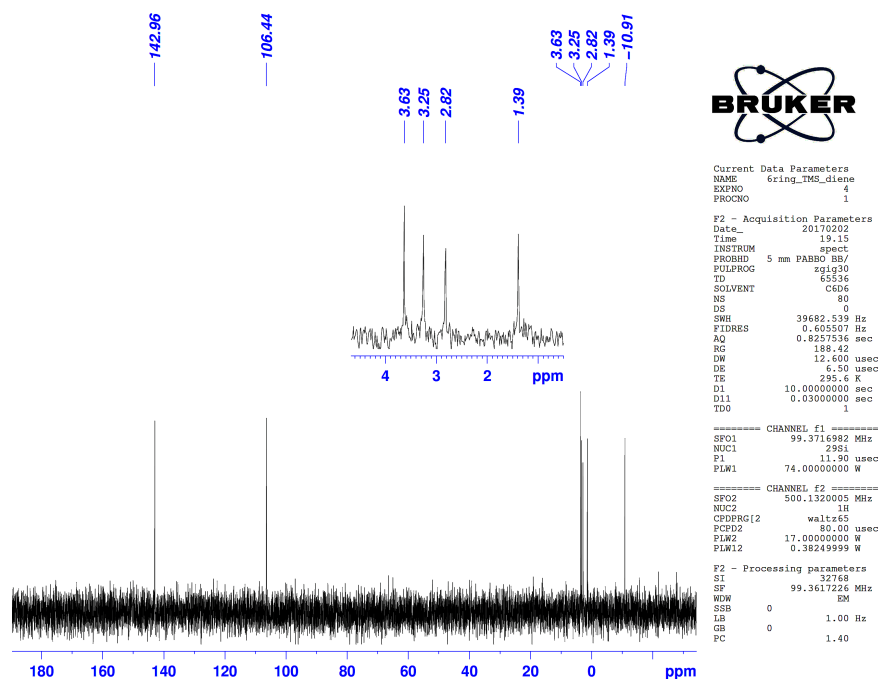

Figure S44.  $^{29}\text{Si}\{^1\text{H}\}$  NMR spectrum of **8** using the inverse-gated pulse sequence in  $\text{C}_6\text{D}_6$  at rt.

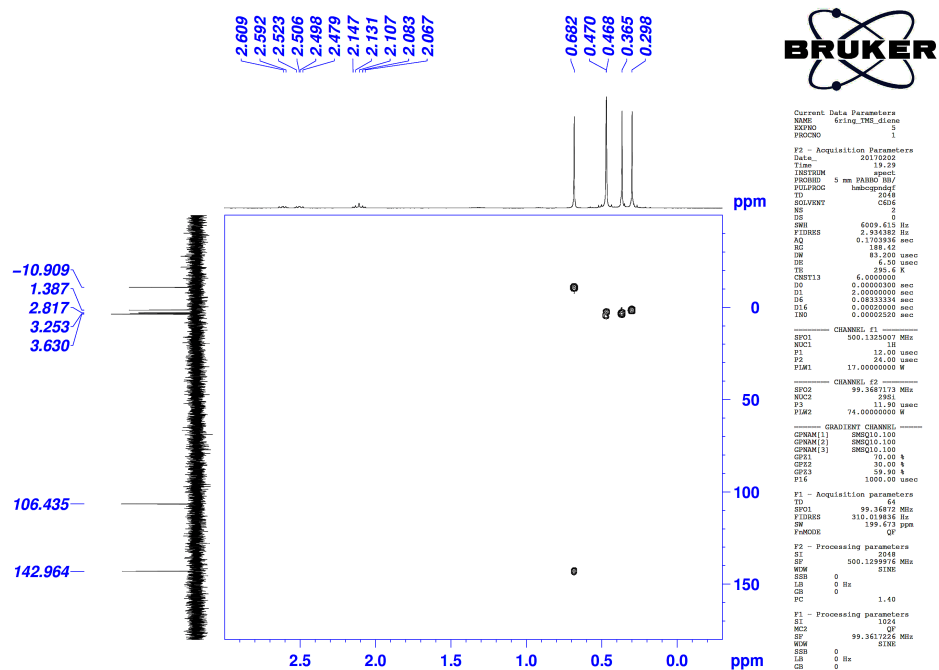

Figure S45.  $^1\text{H}$ - $^{29}\text{Si}$  HMBC 2D NMR spectrum of **8** in  $\text{C}_6\text{D}_6$  at rt.

## 2. UV-vis Spectra

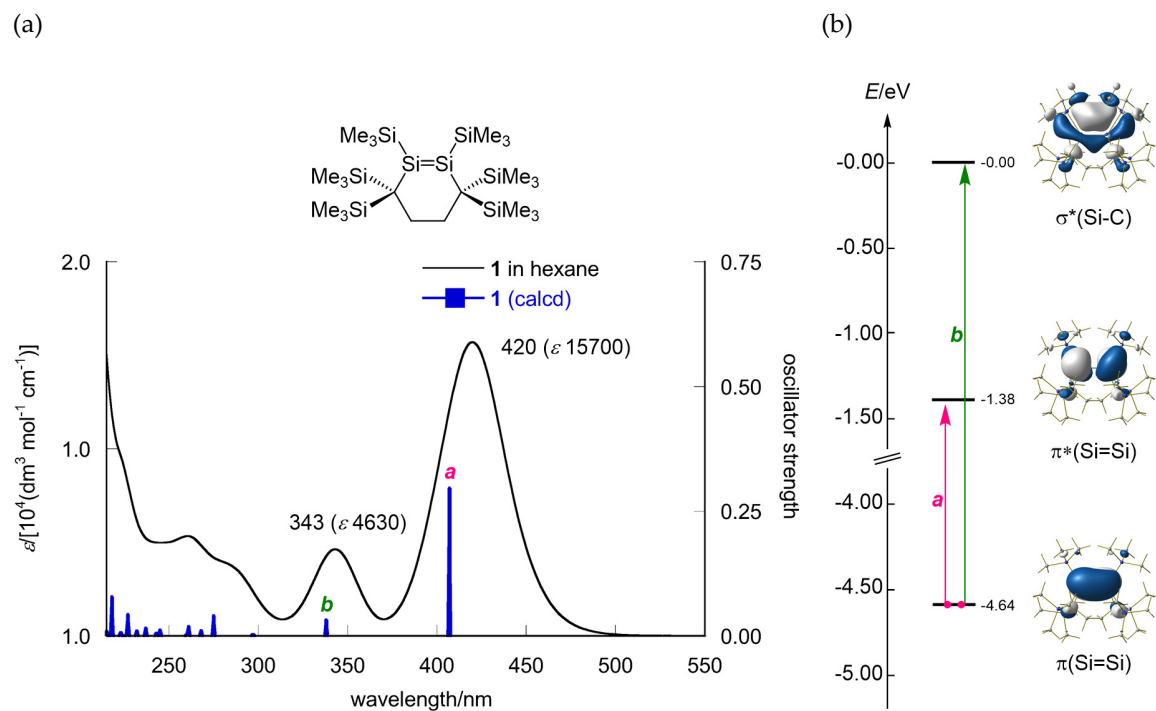

**Figure S46.** (a) UV-vis absorption spectra of **1** at room temperature in hexane (black line) as well as band positions and oscillator strengths (vertical blue bars) calculated at the TD-B3LYP-D3/6-311G(d)[hexane]//B3PW91-D3/6-31G(d) level of theory. (b) Selected frontier Kohn-Sham orbitals (isosurface value = 0.03) and major transitions.

(a)

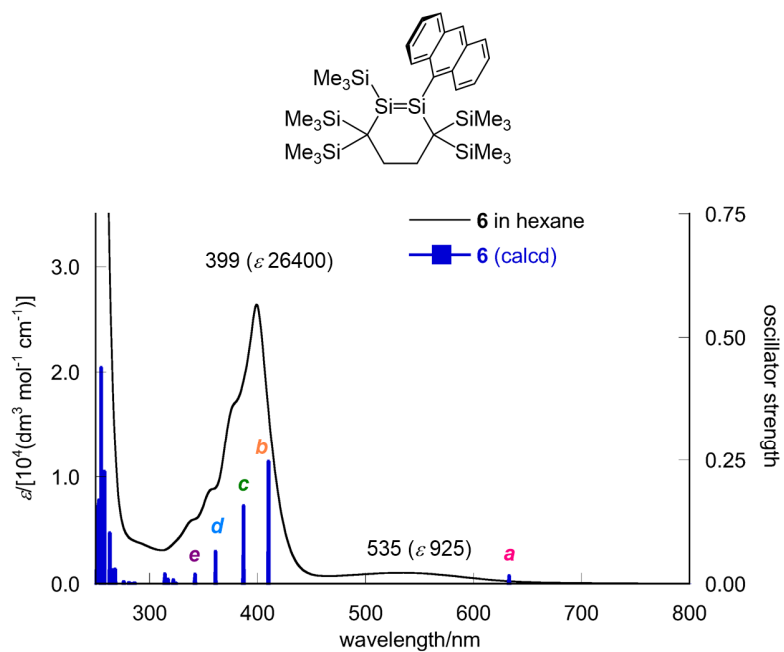

(b)

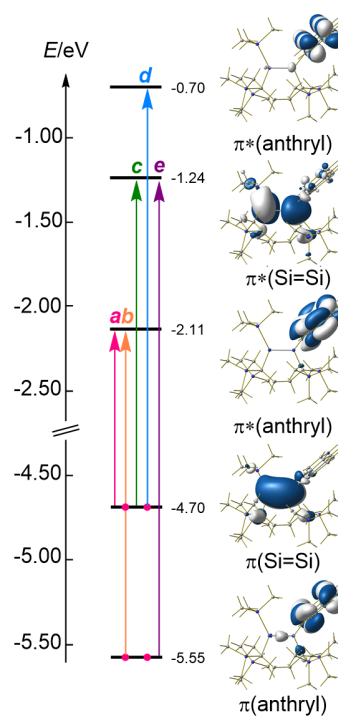

**Figure S47.** (a) UV-vis absorption spectra of **6** at room temperature in hexane (black line) and calculated band positions and oscillator strengths (vertical blue bars) calculated at the TD-B3LYP-D3/6-311G(d) [hexane]/B3PW91-D3/6-31G(d) level of theory. (b) Selected frontier Kohn-Sham orbitals (isosurface value = 0.03) and major transitions.

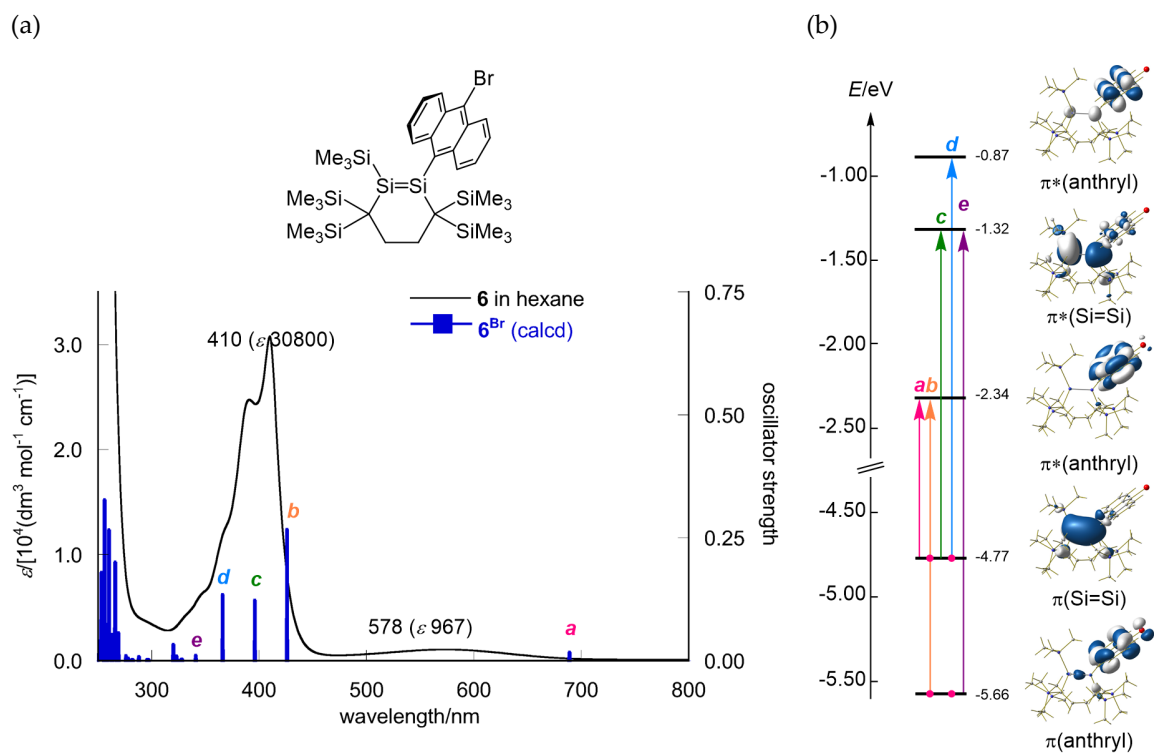

**Figure S48.** (a) UV-vis absorption spectra of **6<sup>Br</sup>** at room temperature in hexane (black line) and calculated band positions and oscillator strengths (vertical blue bars) calculated at the TD-B3LYP-D3/6-311G(d) [hexane]//B3PW91-D3/6-31G(d) level of theory. (b) Selected frontier Kohn-Sham orbitals (isosurface value = 0.03) and major transitions.

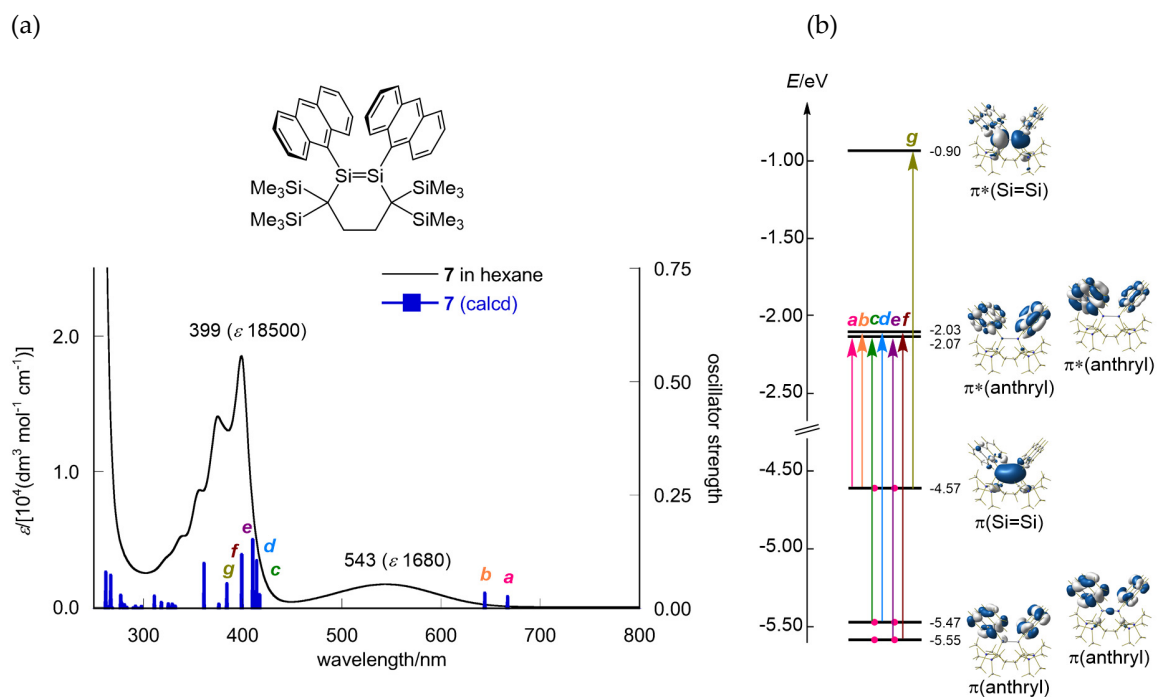

**Figure S49.** (a) UV-vis absorption spectra of **7** at room temperature in hexane (black line) and calculated band positions and oscillator strengths (vertical blue bars) calculated at the TD-B3LYP-D3/6-311G(d) [hexane]//B3PW91-D3/6-31G(d) level of theory. (b) Selected frontier Kohn-Sham orbitals (isosurface value = 0.03) and major transitions.

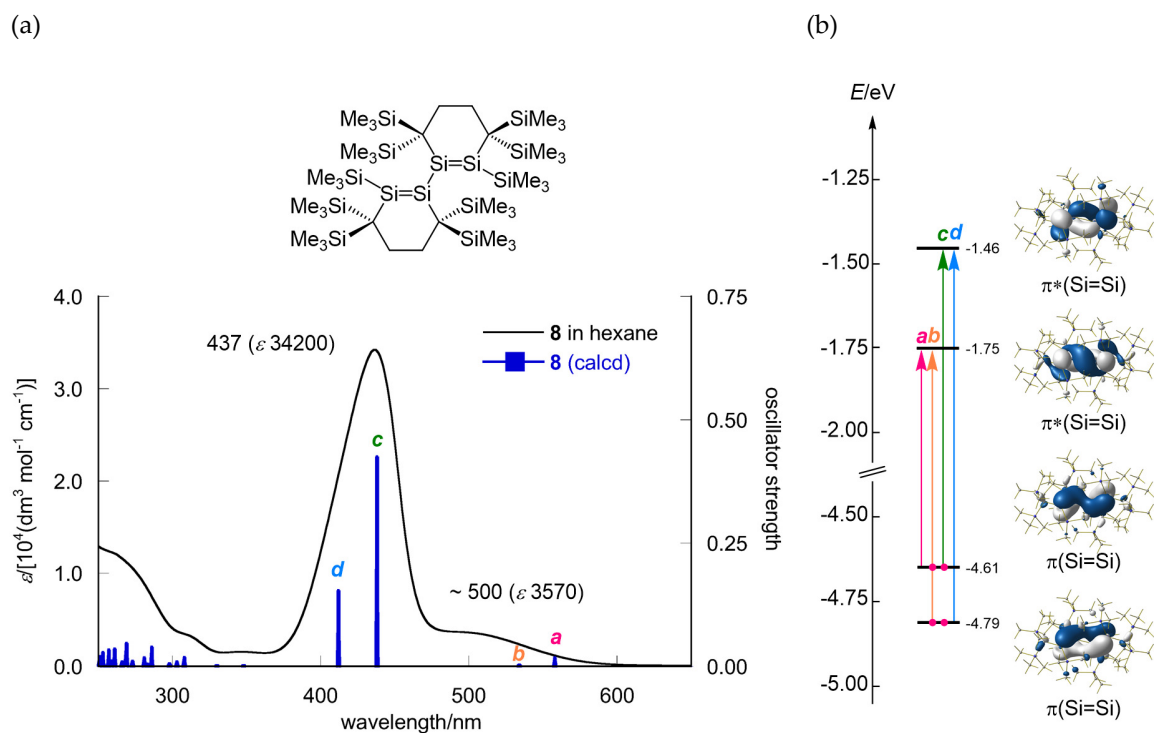

**Figure S50.** (a) UV-vis absorption spectra of **8** at room temperature in hexane (black line) and calculated band positions and oscillator strengths (vertical blue bars) calculated at the TD-B3LYP-D3/6-311G(d) [hexane]/B3PW91-D3/6-31G(d) level of theory. (b) Selected frontier Kohn-Sham orbitals (isosurface value = 0.03) and major transitions.

### 3. DFT Calculations

All theoretical calculations were performed using the Gaussian 09<sup>S1</sup> and GRRM14<sup>S2</sup> programs. Geometry optimizations and frequency analyses of **1**, **6**, **6<sup>Br</sup>**, **7**, and **8** were carried out at the B3PW91-D3/6-31G(d) level of theory for all compounds. Imaginary frequencies were not found in any of the optimized structures. Atomic coordinates for these compounds are summarized in a .xyz file (optimized\_structure\_na04.xyz). The transition energies and oscillator strengths of the electron transitions of **1**, **6**, **6<sup>Br</sup>**, **7**, and **8** were calculated using a time-dependent hybrid DFT method (TD DFT) at the B3LYP/6-311G(d) level of theory (Tables S1-S5). Selected Kohn-Sham orbitals of **1**, **6**, **6<sup>Br</sup>**, **7**, and **8** are shown in Figures S46-S50, respectively. Selected structural parameters and spectral data were summarized in Table S6.

## Calculated Transition Energies and Oscillator Strengths of the Electron

### Transitions

**Table S1.** Transition Energy, Wavelength, and Oscillator Strengths of the Electronic Transition of **1**

|               |     |           |           |           |          |              |
|---------------|-----|-----------|-----------|-----------|----------|--------------|
| Excited State | 1:  | Singlet-A | 3.0400 eV | 407.84 nm | f=0.2970 | <S**2>=0.000 |
| 151 ->152     |     | 0.69541   |           |           |          |              |
| 151 ->153     |     | 0.11294   |           |           |          |              |
| Excited State | 2:  | Singlet-A | 3.6708 eV | 337.76 nm | f=0.0325 | <S**2>=0.000 |
| 151 ->152     |     | -0.11132  |           |           |          |              |
| 151 ->153     |     | 0.69259   |           |           |          |              |
| Excited State | 3:  | Singlet-A | 4.1756 eV | 296.93 nm | f=0.0033 | <S**2>=0.000 |
| 150 ->152     |     | 0.69227   |           |           |          |              |
| 151 ->155     |     | 0.10556   |           |           |          |              |
| Excited State | 4:  | Singlet-A | 4.3616 eV | 284.27 nm | f=0.0003 | <S**2>=0.000 |
| 151 ->155     |     | 0.68344   |           |           |          |              |
| 151 ->159     |     | 0.11496   |           |           |          |              |
| Excited State | 5:  | Singlet-A | 4.5099 eV | 274.92 nm | f=0.0410 | <S**2>=0.000 |
| 149 ->152     |     | -0.18045  |           |           |          |              |
| 151 ->154     |     | 0.67327   |           |           |          |              |
| Excited State | 6:  | Singlet-A | 4.6192 eV | 268.41 nm | f=0.0108 | <S**2>=0.000 |
| 149 ->152     |     | 0.63398   |           |           |          |              |
| 151 ->154     |     | 0.20058   |           |           |          |              |
| 151 ->156     |     | -0.21182  |           |           |          |              |
| Excited State | 7:  | Singlet-A | 4.7439 eV | 261.35 nm | f=0.0194 | <S**2>=0.000 |
| 149 ->152     |     | 0.24149   |           |           |          |              |
| 151 ->156     |     | 0.64524   |           |           |          |              |
| Excited State | 8:  | Singlet-A | 4.7761 eV | 259.60 nm | f=0.0030 | <S**2>=0.000 |
| 151 ->157     |     | 0.64430   |           |           |          |              |
| 151 ->159     |     | -0.24075  |           |           |          |              |
| Excited State | 9:  | Singlet-A | 5.0575 eV | 245.15 nm | f=0.0121 | <S**2>=0.000 |
| 147 ->152     |     | -0.20212  |           |           |          |              |
| 148 ->152     |     | 0.56935   |           |           |          |              |
| 151 ->158     |     | -0.34352  |           |           |          |              |
| Excited State | 10: | Singlet-A | 5.1125 eV | 242.51 nm | f=0.0058 | <S**2>=0.000 |
| 147 ->152     |     | -0.17502  |           |           |          |              |
| 148 ->152     |     | 0.30887   |           |           |          |              |
| 151 ->158     |     | 0.58868   |           |           |          |              |
| 151 ->159     |     | -0.13291  |           |           |          |              |
| Excited State | 11: | Singlet-A | 5.1435 eV | 241.05 nm | f=0.0000 | <S**2>=0.000 |
| 151 ->157     |     | 0.25934   |           |           |          |              |
| 151 ->158     |     | 0.14198   |           |           |          |              |
| 151 ->159     |     | 0.62935   |           |           |          |              |
| Excited State | 12: | Singlet-A | 5.2392 eV | 236.65 nm | f=0.0053 | <S**2>=0.000 |
| 151 ->156     |     | 0.12813   |           |           |          |              |
| 151 ->160     |     | 0.68417   |           |           |          |              |
| Excited State | 13: | Singlet-A | 5.2421 eV | 236.51 nm | f=0.0160 | <S**2>=0.000 |
| 147 ->152     |     | 0.64637   |           |           |          |              |

|                   |           |           |           |          |              |  |  |
|-------------------|-----------|-----------|-----------|----------|--------------|--|--|
| 148 ->152         | 0.26122   |           |           |          |              |  |  |
| Excited State 14: | Singlet-A | 5.3532 eV | 231.61 nm | f=0.0103 | <S**2>=0.000 |  |  |
| 151 ->161         | 0.67455   |           |           |          |              |  |  |
| Excited State 15: | Singlet-A | 5.4548 eV | 227.29 nm | f=0.0434 | <S**2>=0.000 |  |  |
| 150 ->153         | -0.21307  |           |           |          |              |  |  |
| 151 ->162         | 0.58727   |           |           |          |              |  |  |
| 151 ->163         | -0.30095  |           |           |          |              |  |  |
| Excited State 16: | Singlet-A | 5.4765 eV | 226.39 nm | f=0.0008 | <S**2>=0.000 |  |  |
| 146 ->152         | 0.70082   |           |           |          |              |  |  |
| Excited State 17: | Singlet-A | 5.5720 eV | 222.51 nm | f=0.0071 | <S**2>=0.000 |  |  |
| 151 ->162         | 0.31612   |           |           |          |              |  |  |
| 151 ->163         | 0.61477   |           |           |          |              |  |  |
| Excited State 18: | Singlet-A | 5.6991 eV | 217.55 nm | f=0.0789 | <S**2>=0.000 |  |  |
| 150 ->153         | 0.63864   |           |           |          |              |  |  |
| 151 ->162         | 0.19558   |           |           |          |              |  |  |
| 151 ->163         | -0.10860  |           |           |          |              |  |  |
| 151 ->165         | 0.10638   |           |           |          |              |  |  |
| Excited State 19: | Singlet-A | 5.7695 eV | 214.90 nm | f=0.0099 | <S**2>=0.000 |  |  |
| 151 ->161         | -0.10744  |           |           |          |              |  |  |
| 151 ->164         | 0.66255   |           |           |          |              |  |  |
| 151 ->167         | 0.18075   |           |           |          |              |  |  |
| Excited State 20: | Singlet-A | 5.8205 eV | 213.01 nm | f=0.0125 | <S**2>=0.000 |  |  |
| 150 ->153         | -0.11215  |           |           |          |              |  |  |
| 151 ->165         | 0.67262   |           |           |          |              |  |  |
| 151 ->169         | -0.11097  |           |           |          |              |  |  |
| Excited State 21: | Singlet-A | 5.8938 eV | 210.36 nm | f=0.0009 | <S**2>=0.000 |  |  |
| 143 ->152         | -0.12073  |           |           |          |              |  |  |
| 145 ->152         | 0.68561   |           |           |          |              |  |  |
| Excited State 22: | Singlet-A | 5.9183 eV | 209.49 nm | f=0.0010 | <S**2>=0.000 |  |  |
| 142 ->152         | -0.13001  |           |           |          |              |  |  |
| 144 ->152         | 0.65459   |           |           |          |              |  |  |
| 151 ->167         | -0.15955  |           |           |          |              |  |  |
| 151 ->168         | -0.14458  |           |           |          |              |  |  |
| Excited State 23: | Singlet-A | 5.9274 eV | 209.17 nm | f=0.0097 | <S**2>=0.000 |  |  |
| 144 ->152         | 0.12320   |           |           |          |              |  |  |
| 151 ->164         | -0.20175  |           |           |          |              |  |  |
| 151 ->167         | 0.61530   |           |           |          |              |  |  |
| 151 ->168         | -0.13112  |           |           |          |              |  |  |
| 151 ->171         | 0.11668   |           |           |          |              |  |  |
| Excited State 24: | Singlet-A | 5.9320 eV | 209.01 nm | f=0.0004 | <S**2>=0.000 |  |  |
| 151 ->166         | 0.65925   |           |           |          |              |  |  |
| 151 ->169         | 0.16228   |           |           |          |              |  |  |
| Excited State 25: | Singlet-A | 5.9655 eV | 207.84 nm | f=0.0045 | <S**2>=0.000 |  |  |
| 144 ->152         | 0.18394   |           |           |          |              |  |  |
| 151 ->167         | 0.14167   |           |           |          |              |  |  |
| 151 ->168         | 0.62601   |           |           |          |              |  |  |
| 151 ->171         | -0.16672  |           |           |          |              |  |  |
| Excited State 26: | Singlet-A | 6.0047 eV | 206.48 nm | f=0.0018 | <S**2>=0.000 |  |  |
| 141 ->152         | 0.10446   |           |           |          |              |  |  |
| 143 ->152         | 0.67519   |           |           |          |              |  |  |
| 145 ->152         | 0.11491   |           |           |          |              |  |  |
| 151 ->169         | -0.11576  |           |           |          |              |  |  |
| Excited State 27: | Singlet-A | 6.0214 eV | 205.91 nm | f=0.0061 | <S**2>=0.000 |  |  |

|                   |           |           |           |          |              |  |
|-------------------|-----------|-----------|-----------|----------|--------------|--|
| 143 ->152         | 0.11546   |           |           |          |              |  |
| 151 ->165         | 0.12130   |           |           |          |              |  |
| 151 ->166         | -0.15733  |           |           |          |              |  |
| 151 ->169         | 0.64851   |           |           |          |              |  |
| Excited State 28: | Singlet-A | 6.0637 eV | 204.47 nm | f=0.0147 | <S**2>=0.000 |  |
| 136 ->152         | 0.16657   |           |           |          |              |  |
| 139 ->152         | -0.13126  |           |           |          |              |  |
| 140 ->152         | -0.38745  |           |           |          |              |  |
| 142 ->152         | 0.40989   |           |           |          |              |  |
| 149 ->153         | 0.34779   |           |           |          |              |  |
| Excited State 29: | Singlet-A | 6.0873 eV | 203.68 nm | f=0.0631 | <S**2>=0.000 |  |
| 139 ->152         | 0.14445   |           |           |          |              |  |
| 140 ->152         | 0.20109   |           |           |          |              |  |
| 142 ->152         | -0.22046  |           |           |          |              |  |
| 149 ->153         | 0.57382   |           |           |          |              |  |
| 151 ->171         | 0.16947   |           |           |          |              |  |
| Excited State 30: | Singlet-A | 6.0894 eV | 203.61 nm | f=0.0111 | <S**2>=0.000 |  |
| 142 ->152         | 0.13117   |           |           |          |              |  |
| 149 ->153         | -0.13712  |           |           |          |              |  |
| 151 ->168         | 0.19133   |           |           |          |              |  |
| 151 ->171         | 0.61928   |           |           |          |              |  |
| Excited State 31: | Singlet-A | 6.1198 eV | 202.60 nm | f=0.0016 | <S**2>=0.000 |  |
| 136 ->152         | -0.15829  |           |           |          |              |  |
| 140 ->152         | 0.45031   |           |           |          |              |  |
| 142 ->152         | 0.48896   |           |           |          |              |  |
| 144 ->152         | 0.11550   |           |           |          |              |  |
| Excited State 32: | Singlet-A | 6.1257 eV | 202.40 nm | f=0.0576 | <S**2>=0.000 |  |
| 138 ->152         | 0.26970   |           |           |          |              |  |
| 141 ->152         | 0.60533   |           |           |          |              |  |
| 151 ->170         | -0.19014  |           |           |          |              |  |

-----

JOB name: ti552Si2TD  
Method/Basis: TD-B3LYP-D3/6-311G(d) [hexane]

**Table S2.** Transition Energy, Wavelength, and Oscillator Strengths of the Electronic Transition of **6**

|                  |           |           |           |          |              |
|------------------|-----------|-----------|-----------|----------|--------------|
| Excited State 1: | Singlet-A | 1.9565 eV | 633.71 nm | f=0.0166 | <S**2>=0.000 |
| 177 ->178        | 0.70501   |           |           |          |              |
| Excited State 2: | Singlet-A | 3.0231 eV | 410.13 nm | f=0.2474 | <S**2>=0.000 |
| 176 ->178        | 0.66314   |           |           |          |              |
| 177 ->179        | -0.22931  |           |           |          |              |
| Excited State 3: | Singlet-A | 3.2023 eV | 387.17 nm | f=0.1577 | <S**2>=0.000 |
| 176 ->178        | 0.21627   |           |           |          |              |
| 177 ->179        | 0.61532   |           |           |          |              |
| 177 ->180        | 0.24484   |           |           |          |              |
| Excited State 4: | Singlet-A | 3.4339 eV | 361.06 nm | f=0.0655 | <S**2>=0.000 |
| 177 ->179        | -0.22178  |           |           |          |              |
| 177 ->180        | 0.65704   |           |           |          |              |
| Excited State 5: | Singlet-A | 3.6297 eV | 341.58 nm | f=0.0202 | <S**2>=0.000 |
| 174 ->178        | 0.18245   |           |           |          |              |
| 176 ->179        | 0.66889   |           |           |          |              |

|               |           |           |           |           |          |              |
|---------------|-----------|-----------|-----------|-----------|----------|--------------|
| Excited State | 6:        | Singlet-A | 3.8250 eV | 324.14 nm | f=0.0017 | <S**2>=0.000 |
|               | 177 ->182 | 0.68259   |           |           |          |              |
|               | 177 ->183 | 0.10647   |           |           |          |              |
|               | 177 ->184 | 0.11108   |           |           |          |              |
| Excited State | 7:        | Singlet-A | 3.8451 eV | 322.45 nm | f=0.0085 | <S**2>=0.000 |
|               | 174 ->178 | 0.47359   |           |           |          |              |
|               | 175 ->178 | -0.12519  |           |           |          |              |
|               | 176 ->179 | -0.17249  |           |           |          |              |
|               | 176 ->180 | 0.46745   |           |           |          |              |
| Excited State | 8:        | Singlet-A | 3.9064 eV | 317.39 nm | f=0.0094 | <S**2>=0.000 |
|               | 175 ->178 | 0.27917   |           |           |          |              |
|               | 177 ->181 | 0.63857   |           |           |          |              |
| Excited State | 9:        | Singlet-A | 3.9495 eV | 313.92 nm | f=0.0203 | <S**2>=0.000 |
|               | 175 ->178 | 0.62923   |           |           |          |              |
|               | 177 ->181 | -0.28391  |           |           |          |              |
| Excited State | 10:       | Singlet-A | 4.3424 eV | 285.52 nm | f=0.0021 | <S**2>=0.000 |
|               | 173 ->178 | 0.69215   |           |           |          |              |
| Excited State | 11:       | Singlet-A | 4.3895 eV | 282.45 nm | f=0.0009 | <S**2>=0.000 |
|               | 172 ->178 | 0.23107   |           |           |          |              |
|               | 177 ->182 | -0.14114  |           |           |          |              |
|               | 177 ->183 | 0.55755   |           |           |          |              |
|               | 177 ->184 | 0.30019   |           |           |          |              |
| Excited State | 12:       | Singlet-A | 4.4155 eV | 280.79 nm | f=0.0024 | <S**2>=0.000 |
|               | 171 ->178 | -0.15425  |           |           |          |              |
|               | 172 ->178 | 0.58017   |           |           |          |              |
|               | 176 ->181 | 0.24536   |           |           |          |              |
|               | 177 ->183 | -0.22592  |           |           |          |              |
|               | 177 ->184 | -0.10468  |           |           |          |              |
| Excited State | 13:       | Singlet-A | 4.4853 eV | 276.42 nm | f=0.0047 | <S**2>=0.000 |
|               | 175 ->179 | 0.67047   |           |           |          |              |
| Excited State | 14:       | Singlet-A | 4.6350 eV | 267.50 nm | f=0.0299 | <S**2>=0.000 |
|               | 170 ->178 | -0.13086  |           |           |          |              |
|               | 171 ->178 | 0.57194   |           |           |          |              |
|               | 172 ->178 | 0.20292   |           |           |          |              |
|               | 174 ->178 | 0.12394   |           |           |          |              |
|               | 176 ->180 | -0.12260  |           |           |          |              |
|               | 176 ->181 | -0.16400  |           |           |          |              |
|               | 177 ->184 | 0.15656   |           |           |          |              |
| Excited State | 15:       | Singlet-A | 4.6617 eV | 265.96 nm | f=0.0288 | <S**2>=0.000 |
|               | 171 ->178 | -0.27025  |           |           |          |              |
|               | 174 ->178 | 0.11485   |           |           |          |              |
|               | 176 ->180 | -0.13206  |           |           |          |              |
|               | 176 ->181 | -0.12995  |           |           |          |              |
|               | 177 ->183 | -0.29062  |           |           |          |              |
|               | 177 ->184 | 0.51164   |           |           |          |              |
| Excited State | 16:       | Singlet-A | 4.7166 eV | 262.87 nm | f=0.1032 | <S**2>=0.000 |
|               | 171 ->178 | -0.17003  |           |           |          |              |
|               | 174 ->178 | 0.16091   |           |           |          |              |
|               | 176 ->180 | -0.18119  |           |           |          |              |
|               | 176 ->181 | -0.26459  |           |           |          |              |
|               | 177 ->184 | -0.22489  |           |           |          |              |
|               | 177 ->185 | 0.50165   |           |           |          |              |
| Excited State | 17:       | Singlet-A | 4.8010 eV | 258.25 nm | f=0.2271 | <S**2>=0.000 |
|               | 172 ->178 | -0.18268  |           |           |          |              |
|               | 174 ->178 | 0.20127   |           |           |          |              |
|               | 176 ->180 | -0.21204  |           |           |          |              |

|                   |           |           |           |          |              |  |
|-------------------|-----------|-----------|-----------|----------|--------------|--|
| 176 ->181         | 0.50189   |           |           |          |              |  |
| 176 ->182         | -0.24105  |           |           |          |              |  |
| 177 ->185         | 0.17826   |           |           |          |              |  |
| Excited State 18: | Singlet-A | 4.8538 eV | 255.44 nm | f=0.0154 | <S**2>=0.000 |  |
| 172 ->178         | -0.10986  |           |           |          |              |  |
| 176 ->181         | 0.21104   |           |           |          |              |  |
| 176 ->182         | 0.59909   |           |           |          |              |  |
| 177 ->185         | 0.11718   |           |           |          |              |  |
| 177 ->186         | 0.13187   |           |           |          |              |  |
| Excited State 19: | Singlet-A | 4.8544 eV | 255.41 nm | f=0.4240 | <S**2>=0.000 |  |
| 173 ->179         | -0.28558  |           |           |          |              |  |
| 174 ->178         | -0.23010  |           |           |          |              |  |
| 174 ->179         | -0.11967  |           |           |          |              |  |
| 176 ->180         | 0.25067   |           |           |          |              |  |
| 176 ->182         | -0.17684  |           |           |          |              |  |
| 177 ->184         | 0.13152   |           |           |          |              |  |
| 177 ->185         | 0.30505   |           |           |          |              |  |
| 177 ->186         | 0.31989   |           |           |          |              |  |
| Excited State 20: | Singlet-A | 4.8972 eV | 253.17 nm | f=0.1697 | <S**2>=0.000 |  |
| 169 ->178         | -0.28092  |           |           |          |              |  |
| 170 ->178         | 0.43492   |           |           |          |              |  |
| 171 ->178         | 0.10637   |           |           |          |              |  |
| 173 ->179         | 0.19644   |           |           |          |              |  |
| 174 ->178         | -0.14883  |           |           |          |              |  |
| 176 ->180         | 0.15845   |           |           |          |              |  |
| 176 ->182         | 0.11061   |           |           |          |              |  |
| 177 ->185         | 0.16126   |           |           |          |              |  |
| 177 ->186         | -0.22930  |           |           |          |              |  |
| Excited State 21: | Singlet-A | 4.9224 eV | 251.88 nm | f=0.1542 | <S**2>=0.000 |  |
| 169 ->178         | -0.18758  |           |           |          |              |  |
| 170 ->178         | 0.29463   |           |           |          |              |  |
| 174 ->178         | 0.14431   |           |           |          |              |  |
| 174 ->179         | 0.17878   |           |           |          |              |  |
| 176 ->180         | -0.15481  |           |           |          |              |  |
| 177 ->185         | -0.13998  |           |           |          |              |  |
| 177 ->186         | 0.47307   |           |           |          |              |  |
| 177 ->188         | 0.11539   |           |           |          |              |  |
| Excited State 22: | Singlet-A | 4.9365 eV | 251.16 nm | f=0.0832 | <S**2>=0.000 |  |
| 169 ->178         | 0.10053   |           |           |          |              |  |
| 170 ->178         | -0.21964  |           |           |          |              |  |
| 173 ->179         | 0.58801   |           |           |          |              |  |
| 174 ->178         | -0.10106  |           |           |          |              |  |
| 176 ->180         | 0.11071   |           |           |          |              |  |
| 177 ->185         | 0.10790   |           |           |          |              |  |
| 177 ->186         | 0.18098   |           |           |          |              |  |
| Excited State 23: | Singlet-A | 4.9847 eV | 248.73 nm | f=0.1471 | <S**2>=0.000 |  |
| 174 ->178         | -0.10697  |           |           |          |              |  |
| 174 ->179         | 0.65726   |           |           |          |              |  |
| 176 ->180         | 0.13630   |           |           |          |              |  |
| Excited State 24: | Singlet-A | 5.0405 eV | 245.97 nm | f=0.0035 | <S**2>=0.000 |  |
| 167 ->178         | -0.13156  |           |           |          |              |  |
| 169 ->178         | 0.55224   |           |           |          |              |  |
| 170 ->178         | 0.36976   |           |           |          |              |  |
| 171 ->178         | 0.11133   |           |           |          |              |  |
| Excited State 25: | Singlet-A | 5.1943 eV | 238.69 nm | f=0.0173 | <S**2>=0.000 |  |
| 168 ->178         | -0.20468  |           |           |          |              |  |
| 177 ->187         | 0.65144   |           |           |          |              |  |
| Excited State 26: | Singlet-A | 5.2074 eV | 238.09 nm | f=0.0059 | <S**2>=0.000 |  |

|                                              |           |           |           |          |              |  |  |
|----------------------------------------------|-----------|-----------|-----------|----------|--------------|--|--|
| 165 ->178                                    | -0.10564  |           |           |          |              |  |  |
| 166 ->178                                    | -0.12427  |           |           |          |              |  |  |
| 168 ->178                                    | 0.63185   |           |           |          |              |  |  |
| 177 ->187                                    | 0.20514   |           |           |          |              |  |  |
| Excited State 27:                            | Singlet-A | 5.2377 eV | 236.71 nm | f=0.0229 | <S**2>=0.000 |  |  |
| 177 ->186                                    | -0.15360  |           |           |          |              |  |  |
| 177 ->188                                    | 0.64506   |           |           |          |              |  |  |
| 177 ->189                                    | 0.18551   |           |           |          |              |  |  |
| Excited State 28:                            | Singlet-A | 5.2828 eV | 234.69 nm | f=0.0218 | <S**2>=0.000 |  |  |
| 171 ->179                                    | 0.47403   |           |           |          |              |  |  |
| 172 ->179                                    | 0.49218   |           |           |          |              |  |  |
| Excited State 29:                            | Singlet-A | 5.3326 eV | 232.50 nm | f=0.0030 | <S**2>=0.000 |  |  |
| 162 ->178                                    | -0.10286  |           |           |          |              |  |  |
| 163 ->178                                    | -0.10796  |           |           |          |              |  |  |
| 165 ->178                                    | 0.18812   |           |           |          |              |  |  |
| 166 ->178                                    | 0.44992   |           |           |          |              |  |  |
| 167 ->178                                    | -0.37685  |           |           |          |              |  |  |
| 168 ->178                                    | 0.15857   |           |           |          |              |  |  |
| 171 ->179                                    | 0.13863   |           |           |          |              |  |  |
| 172 ->179                                    | -0.11789  |           |           |          |              |  |  |
| Excited State 30:                            | Singlet-A | 5.3520 eV | 231.66 nm | f=0.0033 | <S**2>=0.000 |  |  |
| 167 ->178                                    | 0.18670   |           |           |          |              |  |  |
| 171 ->179                                    | 0.46074   |           |           |          |              |  |  |
| 172 ->179                                    | -0.41742  |           |           |          |              |  |  |
| 174 ->181                                    | 0.12188   |           |           |          |              |  |  |
| Excited State 31:                            | Singlet-A | 5.3727 eV | 230.77 nm | f=0.1079 | <S**2>=0.000 |  |  |
| 175 ->180                                    | 0.67105   |           |           |          |              |  |  |
| Excited State 32:                            | Singlet-A | 5.3933 eV | 229.88 nm | f=0.0025 | <S**2>=0.000 |  |  |
| 158 ->178                                    | 0.11214   |           |           |          |              |  |  |
| 160 ->178                                    | 0.10381   |           |           |          |              |  |  |
| 163 ->178                                    | 0.22042   |           |           |          |              |  |  |
| 166 ->178                                    | 0.43094   |           |           |          |              |  |  |
| 167 ->178                                    | 0.35261   |           |           |          |              |  |  |
| 169 ->178                                    | 0.16244   |           |           |          |              |  |  |
| 176 ->183                                    | -0.16746  |           |           |          |              |  |  |
| -----                                        |           |           |           |          |              |  |  |
| JOB name: ti552SiAntTD                       |           |           |           |          |              |  |  |
| Method/Basis: TD-B3LYP-D3/6-311G(d) [hexane] |           |           |           |          |              |  |  |

**Table S3.** Transition Energy, Wavelength, and Oscillator Strengths of the Electronic Transition of **6<sup>Br</sup>**

|                  |           |           |           |          |              |  |  |
|------------------|-----------|-----------|-----------|----------|--------------|--|--|
| Excited State 1: | Singlet-A | 1.7996 eV | 688.97 nm | f=0.0177 | <S**2>=0.000 |  |  |
| 194 ->195        | 0.70538   |           |           |          |              |  |  |
| Excited State 2: | Singlet-A | 2.9114 eV | 425.86 nm | f=0.2676 | <S**2>=0.000 |  |  |
| 193 ->195        | 0.68615   |           |           |          |              |  |  |
| 194 ->196        | 0.15154   |           |           |          |              |  |  |
| Excited State 3: | Singlet-A | 3.1308 eV | 396.02 nm | f=0.1236 | <S**2>=0.000 |  |  |
| 193 ->195        | -0.12562  |           |           |          |              |  |  |
| 194 ->196        | 0.59830   |           |           |          |              |  |  |
| 194 ->197        | 0.34249   |           |           |          |              |  |  |

|               |     |           |           |           |          |              |
|---------------|-----|-----------|-----------|-----------|----------|--------------|
| Excited State | 4:  | Singlet-A | 3.3836 eV | 366.42 nm | f=0.1352 | <S**2>=0.000 |
| 194 ->196     |     | -0.31852  |           |           |          |              |
| 194 ->197     |     | 0.61195   |           |           |          |              |
| Excited State | 5:  | Singlet-A | 3.6388 eV | 340.73 nm | f=0.0115 | <S**2>=0.000 |
| 191 ->195     |     | 0.27888   |           |           |          |              |
| 193 ->196     |     | 0.62476   |           |           |          |              |
| 193 ->197     |     | 0.13825   |           |           |          |              |
| Excited State | 6:  | Singlet-A | 3.7775 eV | 328.21 nm | f=0.0039 | <S**2>=0.000 |
| 191 ->195     |     | 0.10305   |           |           |          |              |
| 192 ->195     |     | 0.66044   |           |           |          |              |
| 193 ->197     |     | 0.12545   |           |           |          |              |
| 194 ->198     |     | 0.14762   |           |           |          |              |
| Excited State | 7:  | Singlet-A | 3.8154 eV | 324.96 nm | f=0.0012 | <S**2>=0.000 |
| 194 ->198     |     | 0.13665   |           |           |          |              |
| 194 ->199     |     | -0.41200  |           |           |          |              |
| 194 ->200     |     | 0.52334   |           |           |          |              |
| 194 ->201     |     | -0.11232  |           |           |          |              |
| Excited State | 8:  | Singlet-A | 3.8355 eV | 323.26 nm | f=0.0106 | <S**2>=0.000 |
| 191 ->195     |     | 0.40365   |           |           |          |              |
| 192 ->195     |     | -0.15267  |           |           |          |              |
| 193 ->196     |     | -0.27829  |           |           |          |              |
| 193 ->197     |     | 0.45480   |           |           |          |              |
| 194 ->198     |     | -0.12099  |           |           |          |              |
| Excited State | 9:  | Singlet-A | 3.8720 eV | 320.21 nm | f=0.0339 | <S**2>=0.000 |
| 192 ->195     |     | -0.14925  |           |           |          |              |
| 194 ->198     |     | 0.65772   |           |           |          |              |
| 194 ->199     |     | 0.10227   |           |           |          |              |
| Excited State | 10: | Singlet-A | 4.1814 eV | 296.51 nm | f=0.0021 | <S**2>=0.000 |
| 190 ->195     |     | 0.68459   |           |           |          |              |
| 191 ->195     |     | -0.12979  |           |           |          |              |
| Excited State | 11: | Singlet-A | 4.1938 eV | 295.64 nm | f=0.0035 | <S**2>=0.000 |
| 194 ->199     |     | 0.55278   |           |           |          |              |
| 194 ->200     |     | 0.41903   |           |           |          |              |
| Excited State | 12: | Singlet-A | 4.3096 eV | 287.69 nm | f=0.0009 | <S**2>=0.000 |
| 188 ->195     |     | 0.47037   |           |           |          |              |
| 189 ->195     |     | 0.46733   |           |           |          |              |
| 193 ->198     |     | 0.18694   |           |           |          |              |
| Excited State | 13: | Singlet-A | 4.3897 eV | 282.44 nm | f=0.0032 | <S**2>=0.000 |
| 194 ->200     |     | 0.16879   |           |           |          |              |
| 194 ->201     |     | 0.61074   |           |           |          |              |
| 194 ->202     |     | 0.27660   |           |           |          |              |
| Excited State | 14: | Singlet-A | 4.4656 eV | 277.64 nm | f=0.0059 | <S**2>=0.000 |
| 187 ->195     |     | 0.15563   |           |           |          |              |
| 188 ->195     |     | -0.46440  |           |           |          |              |
| 189 ->195     |     | 0.48681   |           |           |          |              |
| Excited State | 15: | Singlet-A | 4.4850 eV | 276.44 nm | f=0.0109 | <S**2>=0.000 |
| 192 ->196     |     | 0.66513   |           |           |          |              |
| 193 ->197     |     | -0.10895  |           |           |          |              |

|               |     |           |           |           |          |              |
|---------------|-----|-----------|-----------|-----------|----------|--------------|
| Excited State | 16: | Singlet-A | 4.6141 eV | 268.71 nm | f=0.0574 | <S**2>=0.000 |
| 186 ->195     |     | -0.29108  |           |           |          |              |
| 191 ->195     |     | 0.14619   |           |           |          |              |
| 193 ->197     |     | -0.15321  |           |           |          |              |
| 193 ->198     |     | -0.30360  |           |           |          |              |
| 193 ->199     |     | 0.42310   |           |           |          |              |
| 194 ->201     |     | 0.10261   |           |           |          |              |
| 194 ->202     |     | -0.14912  |           |           |          |              |
| 194 ->203     |     | -0.13315  |           |           |          |              |
| Excited State | 17: | Singlet-A | 4.6565 eV | 266.26 nm | f=0.2016 | <S**2>=0.000 |
| 186 ->195     |     | 0.41888   |           |           |          |              |
| 187 ->195     |     | -0.10662  |           |           |          |              |
| 191 ->195     |     | 0.24267   |           |           |          |              |
| 193 ->197     |     | -0.25105  |           |           |          |              |
| 193 ->199     |     | -0.16420  |           |           |          |              |
| 193 ->200     |     | 0.10821   |           |           |          |              |
| 194 ->201     |     | 0.12089   |           |           |          |              |
| 194 ->202     |     | -0.24690  |           |           |          |              |
| 194 ->203     |     | -0.18467  |           |           |          |              |
| Excited State | 18: | Singlet-A | 4.6840 eV | 264.70 nm | f=0.0374 | <S**2>=0.000 |
| 186 ->195     |     | 0.33232   |           |           |          |              |
| 187 ->195     |     | -0.15425  |           |           |          |              |
| 193 ->199     |     | 0.41629   |           |           |          |              |
| 193 ->200     |     | 0.33371   |           |           |          |              |
| 194 ->202     |     | 0.12708   |           |           |          |              |
| Excited State | 19: | Singlet-A | 4.7138 eV | 263.02 nm | f=0.0538 | <S**2>=0.000 |
| 193 ->198     |     | -0.11088  |           |           |          |              |
| 194 ->201     |     | -0.20724  |           |           |          |              |
| 194 ->202     |     | 0.48250   |           |           |          |              |
| 194 ->203     |     | -0.40719  |           |           |          |              |
| Excited State | 20: | Singlet-A | 4.7589 eV | 260.53 nm | f=0.0555 | <S**2>=0.000 |
| 185 ->195     |     | -0.26408  |           |           |          |              |
| 186 ->195     |     | 0.12378   |           |           |          |              |
| 187 ->195     |     | 0.55551   |           |           |          |              |
| 189 ->195     |     | -0.11206  |           |           |          |              |
| 193 ->198     |     | 0.20379   |           |           |          |              |
| Excited State | 21: | Singlet-A | 4.7740 eV | 259.70 nm | f=0.2667 | <S**2>=0.000 |
| 185 ->195     |     | 0.10229   |           |           |          |              |
| 186 ->195     |     | -0.17695  |           |           |          |              |
| 187 ->195     |     | -0.18572  |           |           |          |              |
| 188 ->195     |     | -0.16427  |           |           |          |              |
| 191 ->195     |     | 0.20136   |           |           |          |              |
| 193 ->197     |     | -0.22378  |           |           |          |              |
| 193 ->198     |     | 0.50029   |           |           |          |              |
| 193 ->199     |     | 0.12316   |           |           |          |              |
| Excited State | 22: | Singlet-A | 4.8363 eV | 256.36 nm | f=0.3279 | <S**2>=0.000 |
| 190 ->196     |     | -0.19562  |           |           |          |              |
| 191 ->195     |     | 0.18601   |           |           |          |              |
| 193 ->197     |     | -0.19628  |           |           |          |              |
| 193 ->198     |     | -0.17735  |           |           |          |              |
| 194 ->202     |     | 0.22006   |           |           |          |              |
| 194 ->203     |     | 0.43261   |           |           |          |              |
| 194 ->204     |     | 0.22653   |           |           |          |              |

|               |           |           |           |           |          |              |
|---------------|-----------|-----------|-----------|-----------|----------|--------------|
| Excited State | 23:       | Singlet-A | 4.8784 eV | 254.15 nm | f=0.0025 | <S**2>=0.000 |
|               | 182 ->195 | 0.47576   |           |           |          |              |
|               | 183 ->195 | 0.11262   |           |           |          |              |
|               | 185 ->195 | -0.37544  |           |           |          |              |
|               | 187 ->195 | -0.19130  |           |           |          |              |
|               | 190 ->196 | 0.18364   |           |           |          |              |
|               | 194 ->204 | -0.13890  |           |           |          |              |
| Excited State | 24:       | Singlet-A | 4.8890 eV | 253.60 nm | f=0.0127 | <S**2>=0.000 |
|               | 182 ->195 | 0.47029   |           |           |          |              |
|               | 185 ->195 | 0.43001   |           |           |          |              |
|               | 187 ->195 | 0.20983   |           |           |          |              |
| Excited State | 25:       | Singlet-A | 4.9011 eV | 252.97 nm | f=0.1804 | <S**2>=0.000 |
|               | 182 ->195 | -0.16967  |           |           |          |              |
|               | 185 ->195 | 0.13415   |           |           |          |              |
|               | 190 ->196 | 0.38611   |           |           |          |              |
|               | 191 ->195 | 0.15447   |           |           |          |              |
|               | 193 ->197 | -0.15705  |           |           |          |              |
|               | 194 ->203 | 0.22289   |           |           |          |              |
|               | 194 ->204 | -0.38490  |           |           |          |              |
| Excited State | 26:       | Singlet-A | 4.9298 eV | 251.50 nm | f=0.0133 | <S**2>=0.000 |
|               | 190 ->196 | 0.47877   |           |           |          |              |
|               | 191 ->196 | -0.10557  |           |           |          |              |
|               | 193 ->200 | 0.10400   |           |           |          |              |
|               | 194 ->204 | 0.45026   |           |           |          |              |
| Excited State | 27:       | Singlet-A | 4.9444 eV | 250.76 nm | f=0.0408 | <S**2>=0.000 |
|               | 186 ->195 | -0.22665  |           |           |          |              |
|               | 193 ->199 | -0.27234  |           |           |          |              |
|               | 193 ->200 | 0.55908   |           |           |          |              |
|               | 194 ->204 | -0.13428  |           |           |          |              |
| Excited State | 28:       | Singlet-A | 5.0342 eV | 246.28 nm | f=0.0057 | <S**2>=0.000 |
|               | 179 ->195 | 0.17358   |           |           |          |              |
|               | 181 ->195 | -0.10104  |           |           |          |              |
|               | 184 ->195 | 0.65680   |           |           |          |              |
| Excited State | 29:       | Singlet-A | 5.0804 eV | 244.04 nm | f=0.0296 | <S**2>=0.000 |
|               | 190 ->196 | 0.14662   |           |           |          |              |
|               | 191 ->196 | 0.66492   |           |           |          |              |
| Excited State | 30:       | Singlet-A | 5.1645 eV | 240.07 nm | f=0.0010 | <S**2>=0.000 |
|               | 177 ->195 | 0.11600   |           |           |          |              |
|               | 178 ->195 | -0.14048  |           |           |          |              |
|               | 179 ->195 | -0.16235  |           |           |          |              |
|               | 180 ->195 | 0.14241   |           |           |          |              |
|               | 181 ->195 | 0.49584   |           |           |          |              |
|               | 183 ->195 | -0.36126  |           |           |          |              |
|               | 184 ->195 | 0.16846   |           |           |          |              |
| Excited State | 31:       | Singlet-A | 5.2196 eV | 237.53 nm | f=0.0032 | <S**2>=0.000 |
|               | 174 ->195 | 0.11680   |           |           |          |              |
|               | 178 ->195 | 0.14165   |           |           |          |              |
|               | 179 ->195 | -0.19923  |           |           |          |              |
|               | 180 ->195 | 0.17284   |           |           |          |              |
|               | 181 ->195 | 0.28490   |           |           |          |              |
|               | 183 ->195 | 0.46685   |           |           |          |              |
|               | 185 ->195 | 0.17380   |           |           |          |              |

|                   |                                                     |
|-------------------|-----------------------------------------------------|
| 194 ->205         | 0.16393                                             |
| 194 ->206         | 0.10927                                             |
| Excited State 32: | Singlet-A 5.2274 eV 237.18 nm f=0.0239 <S**2>=0.000 |
| 179 ->195         | 0.12910                                             |
| 180 ->195         | -0.10591                                            |
| 183 ->195         | -0.13134                                            |
| 189 ->196         | 0.15291                                             |
| 194 ->205         | 0.58957                                             |
| 194 ->206         | 0.23163                                             |

-----  
 JOB name: ti552SiAntBrTD  
 Method/Basis: TD-B3LYP-D3/6-311G(d) [hexane]

**Table S4.** Transition Energy, Wavelength, and Oscillator Strengths of the Electronic Transition of 7

|                  |           |           |           |          |              |
|------------------|-----------|-----------|-----------|----------|--------------|
| Excited State 1: | Singlet-A | 1.8590 eV | 666.96 nm | f=0.0265 | <S**2>=0.000 |
| 203 -> 204       | 0.69351   |           |           |          |              |
| 203 -> 205       | 0.12643   |           |           |          |              |
| Excited State 2: | Singlet-A | 1.9249 eV | 644.11 nm | f=0.0341 | <S**2>=0.000 |
| 203 -> 204       | -0.12550  |           |           |          |              |
| 203 -> 205       | 0.69249   |           |           |          |              |
| Excited State 3: | Singlet-A | 2.9730 eV | 417.04 nm | f=0.0314 | <S**2>=0.000 |
| 201 -> 204       | 0.17773   |           |           |          |              |
| 201 -> 205       | 0.16081   |           |           |          |              |
| 202 -> 204       | 0.63948   |           |           |          |              |
| 202 -> 205       | 0.17678   |           |           |          |              |
| Excited State 4: | Singlet-A | 2.9943 eV | 414.07 nm | f=0.1066 | <S**2>=0.000 |
| 201 -> 205       | -0.12173  |           |           |          |              |
| 202 -> 204       | -0.15748  |           |           |          |              |
| 202 -> 205       | 0.66662   |           |           |          |              |
| 203 -> 206       | 0.10845   |           |           |          |              |
| Excited State 5: | Singlet-A | 3.0222 eV | 410.24 nm | f=0.1526 | <S**2>=0.000 |
| 201 -> 204       | 0.62294   |           |           |          |              |
| 201 -> 205       | -0.20393  |           |           |          |              |
| 202 -> 204       | -0.11030  |           |           |          |              |
| 203 -> 206       | -0.22618  |           |           |          |              |
| Excited State 6: | Singlet-A | 3.1096 eV | 398.71 nm | f=0.1194 | <S**2>=0.000 |
| 201 -> 204       | 0.18147   |           |           |          |              |
| 201 -> 205       | 0.63643   |           |           |          |              |
| 202 -> 204       | -0.22047  |           |           |          |              |
| Excited State 7: | Singlet-A | 3.2302 eV | 383.82 nm | f=0.0550 | <S**2>=0.000 |
| 201 -> 204       | 0.16927   |           |           |          |              |
| 203 -> 206       | 0.52433   |           |           |          |              |
| 203 -> 207       | 0.26201   |           |           |          |              |
| 203 -> 208       | -0.31701  |           |           |          |              |
| Excited State 8: | Singlet-A | 3.2989 eV | 375.84 nm | f=0.0106 | <S**2>=0.000 |
| 203 -> 206       | -0.12843  |           |           |          |              |
| 203 -> 207       | 0.63353   |           |           |          |              |
| 203 -> 208       | 0.26479   |           |           |          |              |
| Excited State 9: | Singlet-A | 3.4323 eV | 361.23 nm | f=0.1003 | <S**2>=0.000 |

|                   |           |           |           |          |              |  |
|-------------------|-----------|-----------|-----------|----------|--------------|--|
| 203 -> 206        | 0.34031   |           |           |          |              |  |
| 203 -> 207        | -0.15024  |           |           |          |              |  |
| 203 -> 208        | 0.55972   |           |           |          |              |  |
| 203 -> 211        | 0.11072   |           |           |          |              |  |
| Excited State 10: | Singlet-A | 3.7293 eV | 332.46 nm | f=0.0058 | <S**2>=0.000 |  |
| 203 -> 209        | 0.39671   |           |           |          |              |  |
| 203 -> 211        | 0.55731   |           |           |          |              |  |
| Excited State 11: | Singlet-A | 3.7683 eV | 329.02 nm | f=0.0104 | <S**2>=0.000 |  |
| 203 -> 209        | 0.55209   |           |           |          |              |  |
| 203 -> 211        | -0.37677  |           |           |          |              |  |
| Excited State 12: | Singlet-A | 3.7810 eV | 327.91 nm | f=0.0002 | <S**2>=0.000 |  |
| 199 -> 204        | -0.25706  |           |           |          |              |  |
| 199 -> 205        | -0.15717  |           |           |          |              |  |
| 200 -> 204        | -0.11607  |           |           |          |              |  |
| 200 -> 205        | 0.16173   |           |           |          |              |  |
| 201 -> 207        | -0.20508  |           |           |          |              |  |
| 202 -> 206        | 0.51315   |           |           |          |              |  |
| 202 -> 208        | -0.11817  |           |           |          |              |  |
| 203 -> 209        | -0.17281  |           |           |          |              |  |
| Excited State 13: | Singlet-A | 3.8140 eV | 325.08 nm | f=0.0107 | <S**2>=0.000 |  |
| 199 -> 204        | -0.26752  |           |           |          |              |  |
| 199 -> 205        | -0.15337  |           |           |          |              |  |
| 200 -> 204        | 0.19757   |           |           |          |              |  |
| 200 -> 205        | -0.29106  |           |           |          |              |  |
| 201 -> 206        | -0.29708  |           |           |          |              |  |
| 201 -> 208        | 0.21342   |           |           |          |              |  |
| 202 -> 206        | -0.11632  |           |           |          |              |  |
| 202 -> 207        | 0.30109   |           |           |          |              |  |
| 202 -> 208        | 0.10768   |           |           |          |              |  |
| 203 -> 210        | 0.10804   |           |           |          |              |  |
| Excited State 14: | Singlet-A | 3.8930 eV | 318.48 nm | f=0.0117 | <S**2>=0.000 |  |
| 200 -> 204        | -0.12992  |           |           |          |              |  |
| 200 -> 205        | 0.17305   |           |           |          |              |  |
| 202 -> 206        | -0.19273  |           |           |          |              |  |
| 202 -> 208        | -0.18882  |           |           |          |              |  |
| 203 -> 210        | 0.58094   |           |           |          |              |  |
| Excited State 15: | Singlet-A | 3.8958 eV | 318.25 nm | f=0.0023 | <S**2>=0.000 |  |
| 199 -> 204        | 0.20170   |           |           |          |              |  |
| 199 -> 205        | 0.11824   |           |           |          |              |  |
| 200 -> 204        | 0.12018   |           |           |          |              |  |
| 200 -> 205        | -0.17198  |           |           |          |              |  |
| 201 -> 207        | 0.21319   |           |           |          |              |  |
| 202 -> 206        | 0.39401   |           |           |          |              |  |
| 202 -> 208        | 0.25484   |           |           |          |              |  |
| 203 -> 210        | 0.33124   |           |           |          |              |  |
| Excited State 16: | Singlet-A | 3.9852 eV | 311.11 nm | f=0.0280 | <S**2>=0.000 |  |
| 199 -> 204        | -0.10670  |           |           |          |              |  |
| 200 -> 205        | -0.10260  |           |           |          |              |  |
| 201 -> 206        | 0.60803   |           |           |          |              |  |
| 201 -> 208        | 0.17071   |           |           |          |              |  |
| 202 -> 207        | 0.15429   |           |           |          |              |  |
| 203 -> 210        | 0.13444   |           |           |          |              |  |
| Excited State 17: | Singlet-A | 4.1568 eV | 298.27 nm | f=0.0053 | <S**2>=0.000 |  |
| 198 -> 204        | 0.65630   |           |           |          |              |  |
| 198 -> 205        | -0.20020  |           |           |          |              |  |
| 200 -> 204        | -0.10508  |           |           |          |              |  |
| Excited State 18: | Singlet-A | 4.2069 eV | 294.72 nm | f=0.0134 | <S**2>=0.000 |  |
| 198 -> 204        | 0.17093   |           |           |          |              |  |

|                   |           |           |           |          |              |  |
|-------------------|-----------|-----------|-----------|----------|--------------|--|
| 198 -> 205        | 0.63294   |           |           |          |              |  |
| 200 -> 204        | -0.16935  |           |           |          |              |  |
| 200 -> 205        | -0.15221  |           |           |          |              |  |
| Excited State 19: | Singlet-A | 4.2299 eV | 293.12 nm | f=0.0008 | <S**2>=0.000 |  |
| 198 -> 204        | 0.14189   |           |           |          |              |  |
| 198 -> 205        | 0.19507   |           |           |          |              |  |
| 200 -> 204        | 0.55635   |           |           |          |              |  |
| 200 -> 205        | 0.35192   |           |           |          |              |  |
| Excited State 20: | Singlet-A | 4.2424 eV | 292.25 nm | f=0.0057 | <S**2>=0.000 |  |
| 203 -> 212        | 0.68839   |           |           |          |              |  |
| Excited State 21: | Singlet-A | 4.2786 eV | 289.77 nm | f=0.0018 | <S**2>=0.000 |  |
| 199 -> 204        | -0.37809  |           |           |          |              |  |
| 199 -> 205        | 0.59402   |           |           |          |              |  |
| Excited State 22: | Singlet-A | 4.3854 eV | 282.72 nm | f=0.0029 | <S**2>=0.000 |  |
| 196 -> 205        | -0.15760  |           |           |          |              |  |
| 197 -> 204        | 0.26505   |           |           |          |              |  |
| 197 -> 205        | -0.32181  |           |           |          |              |  |
| 201 -> 207        | 0.28564   |           |           |          |              |  |
| 201 -> 208        | -0.14442  |           |           |          |              |  |
| 202 -> 207        | 0.33646   |           |           |          |              |  |
| 202 -> 208        | -0.19079  |           |           |          |              |  |
| 202 -> 209        | -0.10101  |           |           |          |              |  |
| Excited State 23: | Singlet-A | 4.4093 eV | 281.19 nm | f=0.0059 | <S**2>=0.000 |  |
| 196 -> 204        | -0.16649  |           |           |          |              |  |
| 196 -> 205        | -0.24338  |           |           |          |              |  |
| 197 -> 204        | 0.42282   |           |           |          |              |  |
| 197 -> 205        | -0.13415  |           |           |          |              |  |
| 201 -> 207        | -0.18068  |           |           |          |              |  |
| 201 -> 208        | 0.17530   |           |           |          |              |  |
| 201 -> 209        | -0.12945  |           |           |          |              |  |
| 202 -> 207        | -0.30441  |           |           |          |              |  |
| 202 -> 208        | 0.11798   |           |           |          |              |  |
| 202 -> 210        | 0.12711   |           |           |          |              |  |
| Excited State 24: | Singlet-A | 4.4166 eV | 280.72 nm | f=0.0029 | <S**2>=0.000 |  |
| 196 -> 204        | 0.40522   |           |           |          |              |  |
| 197 -> 205        | -0.37402  |           |           |          |              |  |
| 201 -> 207        | -0.22544  |           |           |          |              |  |
| 201 -> 210        | 0.12274   |           |           |          |              |  |
| 202 -> 207        | -0.11546  |           |           |          |              |  |
| 202 -> 208        | 0.19007   |           |           |          |              |  |
| 202 -> 209        | -0.17620  |           |           |          |              |  |
| Excited State 25: | Singlet-A | 4.4566 eV | 278.21 nm | f=0.0135 | <S**2>=0.000 |  |
| 196 -> 204        | 0.12342   |           |           |          |              |  |
| 201 -> 207        | 0.22735   |           |           |          |              |  |
| 201 -> 208        | 0.45688   |           |           |          |              |  |
| 202 -> 207        | -0.22894  |           |           |          |              |  |
| 202 -> 208        | -0.38355  |           |           |          |              |  |
| Excited State 26: | Singlet-A | 4.4835 eV | 276.53 nm | f=0.0297 | <S**2>=0.000 |  |
| 203 -> 213        | 0.55213   |           |           |          |              |  |
| 203 -> 214        | 0.35257   |           |           |          |              |  |
| 203 -> 215        | 0.10451   |           |           |          |              |  |
| 203 -> 218        | 0.13086   |           |           |          |              |  |
| Excited State 27: | Singlet-A | 4.6207 eV | 268.32 nm | f=0.0027 | <S**2>=0.000 |  |
| 196 -> 204        | 0.36673   |           |           |          |              |  |
| 196 -> 205        | 0.19626   |           |           |          |              |  |
| 197 -> 204        | 0.43002   |           |           |          |              |  |
| 197 -> 205        | 0.33959   |           |           |          |              |  |
| 201 -> 209        | 0.10066   |           |           |          |              |  |

|               |            |           |           |           |          |              |
|---------------|------------|-----------|-----------|-----------|----------|--------------|
| Excited State | 28:        | Singlet-A | 4.6398 eV | 267.22 nm | f=0.0510 | <S**2>=0.000 |
|               | 194 -> 204 | 0.14240   |           |           |          |              |
|               | 194 -> 205 | 0.13396   |           |           |          |              |
|               | 195 -> 204 | 0.39066   |           |           |          |              |
|               | 195 -> 205 | -0.14986  |           |           |          |              |
|               | 196 -> 204 | -0.11225  |           |           |          |              |
|               | 202 -> 209 | -0.18022  |           |           |          |              |
|               | 203 -> 213 | 0.25487   |           |           |          |              |
|               | 203 -> 214 | -0.34317  |           |           |          |              |
| Excited State | 29:        | Singlet-A | 4.6521 eV | 266.51 nm | f=0.0231 | <S**2>=0.000 |
|               | 194 -> 204 | 0.10743   |           |           |          |              |
|               | 195 -> 204 | 0.45217   |           |           |          |              |
|               | 195 -> 205 | -0.17778  |           |           |          |              |
|               | 202 -> 209 | 0.10571   |           |           |          |              |
|               | 203 -> 213 | -0.27089  |           |           |          |              |
|               | 203 -> 214 | 0.33914   |           |           |          |              |
| Excited State | 30:        | Singlet-A | 4.6676 eV | 265.63 nm | f=0.0062 | <S**2>=0.000 |
|               | 194 -> 204 | 0.37538   |           |           |          |              |
|               | 195 -> 205 | 0.48126   |           |           |          |              |
|               | 196 -> 204 | -0.18555  |           |           |          |              |
|               | 196 -> 205 | 0.17133   |           |           |          |              |
|               | 197 -> 205 | -0.12971  |           |           |          |              |
|               | 201 -> 209 | 0.10080   |           |           |          |              |
|               | 202 -> 211 | -0.11074  |           |           |          |              |
| Excited State | 31:        | Singlet-A | 4.6746 eV | 265.23 nm | f=0.0003 | <S**2>=0.000 |
|               | 194 -> 204 | -0.14701  |           |           |          |              |
|               | 195 -> 205 | -0.23815  |           |           |          |              |
|               | 196 -> 204 | -0.23918  |           |           |          |              |
|               | 196 -> 205 | 0.51752   |           |           |          |              |
|               | 197 -> 204 | 0.14919   |           |           |          |              |
|               | 197 -> 205 | -0.19953  |           |           |          |              |
| Excited State | 32:        | Singlet-A | 4.7238 eV | 262.47 nm | f=0.0808 | <S**2>=0.000 |
|               | 194 -> 204 | 0.13006   |           |           |          |              |
|               | 194 -> 205 | -0.14419  |           |           |          |              |
|               | 195 -> 205 | -0.14156  |           |           |          |              |
|               | 196 -> 205 | -0.11613  |           |           |          |              |
|               | 199 -> 204 | -0.15048  |           |           |          |              |
|               | 199 -> 205 | -0.10999  |           |           |          |              |
|               | 200 -> 204 | -0.12242  |           |           |          |              |
|               | 200 -> 205 | 0.20198   |           |           |          |              |
|               | 201 -> 207 | 0.24035   |           |           |          |              |
|               | 201 -> 209 | 0.15940   |           |           |          |              |
|               | 202 -> 208 | 0.22759   |           |           |          |              |
|               | 202 -> 210 | -0.16576  |           |           |          |              |
|               | 203 -> 215 | 0.32085   |           |           |          |              |
|               | 203 -> 216 | 0.14044   |           |           |          |              |

-----  
 JOB name: ti552Ant2TD  
 Method/Basis: TD-B3LYP-D3/6-311G(d) [hexane]

**Table S5.** Transition Energy, Wavelength, and Oscillator Strengths of the Electronic Transition of **8**

|               |            |           |           |           |          |              |
|---------------|------------|-----------|-----------|-----------|----------|--------------|
| Excited State | 1:         | Singlet-A | 2.2210 eV | 558.24 nm | f=0.0181 | <S**2>=0.000 |
|               | 260 -> 263 | -0.27062  |           |           |          |              |
|               | 261 -> 262 | 0.65165   |           |           |          |              |

|               |            |           |           |           |          |              |
|---------------|------------|-----------|-----------|-----------|----------|--------------|
| Excited State | 2:         | Singlet-A | 2.3184 eV | 534.78 nm | f=0.0034 | <S**2>=0.000 |
|               | 260 -> 262 | 0.58675   |           |           |          |              |
|               | 261 -> 263 | -0.39196  |           |           |          |              |
| Excited State | 3:         | Singlet-A | 2.8261 eV | 438.71 nm | f=0.4257 | <S**2>=0.000 |
|               | 260 -> 262 | 0.39217   |           |           |          |              |
|               | 261 -> 263 | 0.58535   |           |           |          |              |
| Excited State | 4:         | Singlet-A | 3.0058 eV | 412.48 nm | f=0.1538 | <S**2>=0.000 |
|               | 260 -> 263 | 0.64538   |           |           |          |              |
|               | 261 -> 262 | 0.26327   |           |           |          |              |
| Excited State | 5:         | Singlet-A | 3.5651 eV | 347.77 nm | f=0.0020 | <S**2>=0.000 |
|               | 261 -> 264 | 0.69620   |           |           |          |              |
| Excited State | 6:         | Singlet-A | 3.7556 eV | 330.13 nm | f=0.0022 | <S**2>=0.000 |
|               | 260 -> 264 | 0.68038   |           |           |          |              |
|               | 261 -> 265 | 0.16167   |           |           |          |              |
| Excited State | 7:         | Singlet-A | 3.9780 eV | 311.68 nm | f=0.0003 | <S**2>=0.000 |
|               | 259 -> 262 | 0.22513   |           |           |          |              |
|               | 260 -> 264 | -0.14284  |           |           |          |              |
|               | 260 -> 266 | 0.26120   |           |           |          |              |
|               | 261 -> 265 | 0.58813   |           |           |          |              |
| Excited State | 8:         | Singlet-A | 4.0275 eV | 307.84 nm | f=0.0187 | <S**2>=0.000 |
|               | 260 -> 265 | 0.41005   |           |           |          |              |
|               | 261 -> 266 | 0.54771   |           |           |          |              |
| Excited State | 9:         | Singlet-A | 4.0979 eV | 302.55 nm | f=0.0094 | <S**2>=0.000 |
|               | 258 -> 263 | 0.21916   |           |           |          |              |
|               | 259 -> 262 | 0.60887   |           |           |          |              |
|               | 260 -> 264 | 0.10946   |           |           |          |              |
|               | 261 -> 265 | -0.21528  |           |           |          |              |
| Excited State | 10:        | Singlet-A | 4.1588 eV | 298.13 nm | f=0.0061 | <S**2>=0.000 |
|               | 257 -> 263 | 0.10577   |           |           |          |              |
|               | 258 -> 262 | 0.60406   |           |           |          |              |
|               | 259 -> 263 | 0.31955   |           |           |          |              |
| Excited State | 11:        | Singlet-A | 4.3403 eV | 285.66 nm | f=0.0294 | <S**2>=0.000 |
|               | 259 -> 263 | 0.18493   |           |           |          |              |
|               | 260 -> 265 | 0.52452   |           |           |          |              |
|               | 261 -> 266 | -0.40439  |           |           |          |              |
| Excited State | 12:        | Singlet-A | 4.3427 eV | 285.50 nm | f=0.0104 | <S**2>=0.000 |
|               | 260 -> 266 | 0.62606   |           |           |          |              |
|               | 261 -> 265 | -0.25567  |           |           |          |              |
|               | 261 -> 267 | -0.10144  |           |           |          |              |
| Excited State | 13:        | Singlet-A | 4.3837 eV | 282.83 nm | f=0.0051 | <S**2>=0.000 |
|               | 256 -> 263 | 0.10980   |           |           |          |              |
|               | 257 -> 262 | 0.65098   |           |           |          |              |
|               | 258 -> 263 | 0.18694   |           |           |          |              |
|               | 259 -> 262 | -0.11519  |           |           |          |              |
| Excited State | 14:        | Singlet-A | 4.4168 eV | 280.71 nm | f=0.0182 | <S**2>=0.000 |
|               | 256 -> 262 | -0.13986  |           |           |          |              |
|               | 257 -> 263 | -0.11815  |           |           |          |              |

|                   |           |           |           |          |              |  |  |
|-------------------|-----------|-----------|-----------|----------|--------------|--|--|
| 258 -> 262        | -0.31047  |           |           |          |              |  |  |
| 259 -> 263        | 0.57226   |           |           |          |              |  |  |
| 260 -> 265        | -0.16077  |           |           |          |              |  |  |
| Excited State 15: | Singlet-A | 4.5385 eV | 273.18 nm | f=0.0107 | <S**2>=0.000 |  |  |
| 260 -> 268        | -0.12687  |           |           |          |              |  |  |
| 261 -> 267        | 0.66650   |           |           |          |              |  |  |
| 261 -> 269        | 0.10850   |           |           |          |              |  |  |
| Excited State 16: | Singlet-A | 4.6088 eV | 269.01 nm | f=0.0471 | <S**2>=0.000 |  |  |
| 256 -> 262        | 0.44374   |           |           |          |              |  |  |
| 257 -> 263        | 0.33222   |           |           |          |              |  |  |
| 258 -> 262        | -0.14895  |           |           |          |              |  |  |
| 259 -> 263        | 0.10428   |           |           |          |              |  |  |
| 260 -> 267        | 0.13862   |           |           |          |              |  |  |
| 260 -> 270        | 0.10429   |           |           |          |              |  |  |
| 261 -> 268        | -0.30249  |           |           |          |              |  |  |
| Excited State 17: | Singlet-A | 4.6213 eV | 268.29 nm | f=0.0112 | <S**2>=0.000 |  |  |
| 257 -> 262        | -0.21873  |           |           |          |              |  |  |
| 258 -> 263        | 0.60799   |           |           |          |              |  |  |
| 259 -> 262        | -0.18392  |           |           |          |              |  |  |
| 261 -> 269        | 0.11247   |           |           |          |              |  |  |
| Excited State 18: | Singlet-A | 4.6609 eV | 266.01 nm | f=0.0094 | <S**2>=0.000 |  |  |
| 256 -> 262        | 0.30261   |           |           |          |              |  |  |
| 257 -> 263        | 0.18351   |           |           |          |              |  |  |
| 260 -> 267        | -0.34830  |           |           |          |              |  |  |
| 260 -> 270        | -0.12522  |           |           |          |              |  |  |
| 261 -> 268        | 0.45250   |           |           |          |              |  |  |
| Excited State 19: | Singlet-A | 4.7137 eV | 263.03 nm | f=0.0000 | <S**2>=0.000 |  |  |
| 258 -> 263        | -0.16327  |           |           |          |              |  |  |
| 260 -> 268        | -0.20607  |           |           |          |              |  |  |
| 260 -> 271        | -0.11621  |           |           |          |              |  |  |
| 261 -> 267        | -0.16546  |           |           |          |              |  |  |
| 261 -> 269        | 0.51387   |           |           |          |              |  |  |
| 261 -> 270        | 0.32268   |           |           |          |              |  |  |
| Excited State 20: | Singlet-A | 4.7540 eV | 260.80 nm | f=0.0359 | <S**2>=0.000 |  |  |
| 256 -> 262        | 0.19620   |           |           |          |              |  |  |
| 257 -> 263        | -0.12549  |           |           |          |              |  |  |
| 260 -> 267        | 0.53042   |           |           |          |              |  |  |
| 261 -> 268        | 0.27408   |           |           |          |              |  |  |
| 261 -> 271        | 0.24895   |           |           |          |              |  |  |
| Excited State 21: | Singlet-A | 4.7814 eV | 259.31 nm | f=0.0115 | <S**2>=0.000 |  |  |
| 254 -> 262        | -0.11504  |           |           |          |              |  |  |
| 256 -> 262        | -0.36017  |           |           |          |              |  |  |
| 257 -> 263        | 0.53598   |           |           |          |              |  |  |
| 260 -> 267        | 0.15726   |           |           |          |              |  |  |
| 261 -> 268        | 0.14410   |           |           |          |              |  |  |
| Excited State 22: | Singlet-A | 4.8180 eV | 257.34 nm | f=0.0335 | <S**2>=0.000 |  |  |
| 255 -> 262        | -0.12380  |           |           |          |              |  |  |
| 260 -> 268        | 0.32251   |           |           |          |              |  |  |
| 260 -> 271        | 0.10155   |           |           |          |              |  |  |
| 261 -> 269        | 0.41725   |           |           |          |              |  |  |
| 261 -> 270        | -0.37664  |           |           |          |              |  |  |
| 261 -> 276        | 0.12597   |           |           |          |              |  |  |

|                   |           |           |           |          |              |
|-------------------|-----------|-----------|-----------|----------|--------------|
| Excited State 23: | Singlet-A | 4.8680 eV | 254.69 nm | f=0.0012 | <S**2>=0.000 |
| 255 -> 262        | 0.62836   |           |           |          |              |
| 256 -> 263        | 0.20553   |           |           |          |              |
| 261 -> 269        | 0.10406   |           |           |          |              |
| Excited State 24: | Singlet-A | 4.8934 eV | 253.37 nm | f=0.0282 | <S**2>=0.000 |
| 254 -> 262        | 0.58914   |           |           |          |              |
| 255 -> 263        | 0.16304   |           |           |          |              |
| 257 -> 263        | 0.13258   |           |           |          |              |
| 260 -> 269        | -0.26805  |           |           |          |              |
| Excited State 25: | Singlet-A | 4.9039 eV | 252.83 nm | f=0.0002 | <S**2>=0.000 |
| 253 -> 262        | 0.45003   |           |           |          |              |
| 254 -> 263        | -0.12750  |           |           |          |              |
| 255 -> 262        | -0.21694  |           |           |          |              |
| 256 -> 263        | 0.44865   |           |           |          |              |
| Excited State 26: | Singlet-A | 4.9333 eV | 251.32 nm | f=0.0205 | <S**2>=0.000 |
| 254 -> 262        | 0.28893   |           |           |          |              |
| 260 -> 269        | 0.55122   |           |           |          |              |
| 260 -> 270        | 0.21557   |           |           |          |              |
| 261 -> 268        | 0.15520   |           |           |          |              |
| 261 -> 271        | -0.11988  |           |           |          |              |
| Excited State 27: | Singlet-A | 4.9577 eV | 250.08 nm | f=0.0004 | <S**2>=0.000 |
| 260 -> 267        | -0.18024  |           |           |          |              |
| 260 -> 269        | 0.16770   |           |           |          |              |
| 261 -> 266        | -0.10810  |           |           |          |              |
| 261 -> 268        | -0.23193  |           |           |          |              |
| 261 -> 271        | 0.56650   |           |           |          |              |
| Excited State 28: | Singlet-A | 4.9598 eV | 249.98 nm | f=0.0044 | <S**2>=0.000 |
| 260 -> 268        | 0.51424   |           |           |          |              |
| 260 -> 271        | 0.10416   |           |           |          |              |
| 261 -> 270        | 0.43774   |           |           |          |              |
| Excited State 29: | Singlet-A | 5.0580 eV | 245.12 nm | f=0.0016 | <S**2>=0.000 |
| 260 -> 269        | -0.17809  |           |           |          |              |
| 260 -> 270        | 0.56016   |           |           |          |              |
| 261 -> 271        | 0.11448   |           |           |          |              |
| 261 -> 272        | 0.28494   |           |           |          |              |
| 261 -> 274        | 0.14955   |           |           |          |              |
| Excited State 30: | Singlet-A | 5.0696 eV | 244.56 nm | f=0.0008 | <S**2>=0.000 |
| 251 -> 262        | -0.13771  |           |           |          |              |
| 253 -> 262        | -0.46213  |           |           |          |              |
| 256 -> 263        | 0.47186   |           |           |          |              |
| Excited State 31: | Singlet-A | 5.0975 eV | 243.23 nm | f=0.0027 | <S**2>=0.000 |
| 260 -> 270        | -0.22995  |           |           |          |              |
| 260 -> 275        | 0.10281   |           |           |          |              |
| 261 -> 271        | -0.19883  |           |           |          |              |
| 261 -> 272        | 0.60748   |           |           |          |              |
| Excited State 32: | Singlet-A | 5.1147 eV | 242.41 nm | f=0.0013 | <S**2>=0.000 |
| 260 -> 266        | -0.10534  |           |           |          |              |
| 260 -> 268        | -0.16651  |           |           |          |              |
| 260 -> 271        | 0.55044   |           |           |          |              |
| 260 -> 272        | 0.12605   |           |           |          |              |

261 -> 273 0.30040  
261 -> 276 0.16433

JOB name: ti552butadieneTD  
Method/Basis: TD-B3LYP-D3/6-311G(d) [hexane]

**Table S6.** Selected Parameters

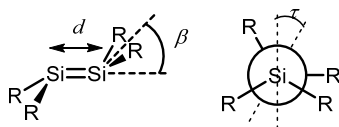

| Cpd                                        | d/Å                                 | angle sum at Si/°                                                           | $\beta$ /°                                                      | $\tau$ /°                                                         |
|--------------------------------------------|-------------------------------------|-----------------------------------------------------------------------------|-----------------------------------------------------------------|-------------------------------------------------------------------|
| <b>1</b> (XRD)                             | 2.1762(5)                           | 358.52(3) (Si1-SiMe <sub>3</sub> ),<br>359.61(3) (Si2-SiMe <sub>3</sub> )   | 12.9 (Si1-SiMe <sub>3</sub> ),<br>6.5 (Si2-SiMe <sub>3</sub> )  | 17.7                                                              |
| <b>1</b> (calcd) <sup>a</sup>              | 2.17640                             | 358.58, 358.58                                                              | 12.6 (Si1), 12.6 (Si1)                                          | 12.9                                                              |
| <b>4</b> (XRD)                             | 2.2035(5)                           | 358.04(3) (=Si...K),<br>359.94(3) (=Si-SiMe <sub>3</sub> )                  | 3.7 (=Si...K),<br>1.5 (=Si-SiMe <sub>3</sub> )                  | 2.5                                                               |
| <b>5</b> (XRD)                             | 2.1860(19)                          | 358.8(1) (=Si-SiEt <sub>3</sub> ),<br>358.6(1) (=Si-SiMe <sub>3</sub> )     | 11.2 (=Si-SiEt <sub>3</sub> ),<br>12.1 (=Si-SiMe <sub>3</sub> ) | 17.6                                                              |
| <b>6</b> (XRD)                             | 2.1598(6)                           | 360.00(5) (=Si-Ant),<br>355.98(3) (=Si-SiMe <sub>3</sub> )                  | 0.1 (=Si-Ant),<br>22.5 (=Si-SiMe <sub>3</sub> )                 | 0.1                                                               |
| <b>6</b> (calcd) <sup>a</sup>              | 2.15862                             | 358.25 (=Si-Ant),<br>354.93 (=Si-SiMe <sub>3</sub> )                        | 12.9 (=Si-Ant),<br>25.3 (=Si-SiMe <sub>3</sub> )                | 3.7                                                               |
| <b>6<sup>Br</sup></b> (XRD)                | 2.1711(7)                           | 359.76(6) (=Si-Ant <sup>Br</sup> ),<br>356.04(5) (=Si-SiMe <sub>3</sub> )   | 4.7 (=Si-Ant <sup>Br</sup> ),<br>22.4 (=Si-SiMe <sub>3</sub> )  | 8.5                                                               |
| <b>6<sup>Br</sup></b> (calcd) <sup>a</sup> | 2.1574                              | 358.25 (=Si-Ant <sup>Br</sup> ),<br>354.93 (=Si-SiMe <sub>3</sub> )         | 12.1 (=Si-Ant <sup>Br</sup> ),<br>25.3 (=Si-SiMe <sub>3</sub> ) | 3.7                                                               |
| <b>7</b> (XRD)                             | 2.1525(7)                           | 357.10(6) (Si1-Ant),<br>355.71(6) (Si2-Ant)                                 | 17.4 (=Si1-Ant),<br>21.0 (=Si2-Ant)                             | 3.3                                                               |
| <b>7</b> (calcd) <sup>a</sup>              | 2.1440                              | 356.42 (Si1-Ant),<br>358.43 (Si2-Ant)                                       | 19.1 (=Si1-Ant),<br>12.8 (=Si2-Ant)                             | 2.8                                                               |
| <b>8</b> (XRD)                             | 2.1850(4)<br>2.1915(5)<br>(Si3=Si4) | 359.99(4) (Si1),<br>359.99(3) (Si2),<br>359.98(3) (Si3),<br>359.94(4) (Si4) | 0.3 (Si1),<br>1.2 (Si2),<br>1.0 (Si3),<br>2.4 (Si4)             | 0.7 (Si1=Si2),<br>1.8 (Si3=Si4)<br>[-88.36(2)° (Si1-Si2-Si3-Si4)] |
| <b>8</b> (calcd) <sup>a</sup>              | 2.1907, 2.1904                      | 359.33 (Si1),<br>359.04 (Si2),<br>359.10 (Si3),<br>358.39 (Si4)             | 13.6 (Si1),<br>10.5 (Si2),<br>10.3 (Si3),<br>13.3 (Si4)         | 3.9 (Si1=Si2),<br>3.9 (Si3=Si4),<br>[-71.4° (Si1-Si2-Si3-Si4)]    |

a. The geometry was optimized at the B3PW91-D3/6-31G(d) level of theory.

#### 4. References

- S1. **Gaussian 09**, Revision E.01, Frisch, M. J.; Trucks, G. W.; Schlegel, H. B.; Scuseria, G. E.; Robb, M. A.; Cheeseman, J. R.; Scalmani, G.; Barone, V.; Mennucci, B.; Petersson, G. A.; Nakatsuji, H.; Caricato, M.; Li, X.; Hratchian, H. P.; Izmaylov, A. F.; Bloino, J.; Zheng, G.; Sonnenberg, J. L.; Hada, M.; Ehara, M.; Toyota, K.; Fukuda, R.; Hasegawa, J.; Ishida, M.; Nakajima, T.; Honda, Y.; Kitao, O.; Nakai, H.; Vreven, T.; Montgomery, J. A., Jr.; Peralta, J. E.; Ogliaro, F.; Bearpark, M.; Heyd, J. J.; Brothers, E.; Kudin, K. N.; Staroverov, V. N.; Kobayashi, R.; Normand, J.; Raghavachari, K.; Rendell, A.; Burant, J. C.; Iyengar, S. S.; Tomasi, J.; Cossi, M.; Rega, N.; Millam, J. M.; Klene, M.; Knox, J. E.; Cross, J. B.; Bakken, V.; Adamo, C.; Jaramillo, J.; Gomperts, R.; Stratmann, R. E.; Yazyev, O.; Austin, A. J.; Cammi, R.; Pomelli, C.; Ochterski, J. W.; Martin, R. L.; Morokuma, K.; Zakrzewski, V. G.; Voth, G. A.; Salvador, P.; Dannenberg, J. J.; Dapprich, S.; Daniels, A. D.; Farkas, Ö.; Foresman, J. B.; Ortiz, J. V.; Cioslowski, J.; Fox, D. J. Gaussian, Inc., Wallingford CT, 2009.
- S2. **GRRM14**, Maeda, S.; Harabuchi, Y.; Osada, Y.; Taketsugu, T.; Morokuma, K.; Ohno, K.; see: <http://grrm.chem.tohoku.ac.jp/GRRM/>; Maeda, S.; Ohno, K.; Morokuma, K. *Phys. Chem. Chem. Phys.* **2013**, *15*, 3683-3701.
